# Supplementary material for: Ru-catalysed oxidative cyclisation of 1,5-dienes: an unprecedented role for the co-oxidant
Source: Royal Society of Chemistry journal article supplement (doi:10.1039/d0ra02303e), 2020-01-01
Supplement: d0ra02303e1.pdf [file d0ra02303e1.pdf]

Electronic Supplementary Information

# Ru-Catalysed Oxidative Cyclisation of 1,5-Dienes: Unprecedented Role for Co-Oxidant

Aqeel A. Hussein

School of Chemistry, University of Southampton, Southampton, Hampshire, SO17 1BJ, United Kingdom.

College of Dentistry, University of Al-Ameed, Karbala PO Box 198, Iraq.

Email: aahh1f19@soton.ac.uk

## TABLE OF CONTENTS

|      |                                                                                                                  |   |
|------|------------------------------------------------------------------------------------------------------------------|---|
| 1.   | Additional computational results                                                                                 | 2 |
| 1.1. | High spin oxidative cyclisations                                                                                 | 2 |
| 1.2. | Hydrolysis pathways considered for $\mathbf{9}_{[\text{ox}]}$                                                    | 5 |
| 1.3. | Reoxidation of Ru(IV)→Ru(VI) bisglycolate intermediate and hydrolysis to release either THF-diol or vicinal diol | 6 |
| 2.   | Supplementary computational and cartesian coordinates data                                                       | 7 |

## 1- Additional computational results

### 1.1 High spin oxidative cyclisations of 1,5-diene

High spin multiplicities for the oxidative cyclisation have been calculated to account for further investigations. These calculations were performed for the second reaction step, the cyclisation steps. The Ru(VI) glycolate intermediates have two electrons in *d* orbitals and, so, only singlet and triplet spin multiplicities were computationally done as indicated. Also, the singlet, triplet and quintet spins were suggested for the transition states of cyclisations and the cycloadduct Ru(IV) THF-diolate intermediates. All the calculations for high spin multiplicities triplet and quintet are done to confirm that singlet spin is the favored one during Ru(VI) glycolate cyclisation. Calculations show that high spin cyclisations are not favoured either without additive (Fig. ESI1) or with additive either H<sub>2</sub>O (Fig. ESI2) or NaIO<sub>4</sub> (Fig. ESI3) because the singlet Ru(VI) glycolate intermediates **7**, **7**<sub>H<sub>2</sub>O</sub>, and **7**<sub>NaIO<sub>4</sub></sub> are energetically more stable than for those triplet Ru(VI) glycolate intermediates **7t**, **7t**<sub>H<sub>2</sub>O</sub>, and **7t**<sub>NaIO<sub>4</sub></sub>. The disfavourability of high spin, triplet, is increased when Ru(VI) glycolate is complexed with H<sub>2</sub>O and NaIO<sub>4</sub> (see Fig. ESI2 and NaIO<sub>4</sub> Fig. ESI3). Therefore, all cyclisations would more likely occur via singlet spin multiplicity.

It is important to mention that the calculations with triplet and quintet spin multiplicities have shown no problem with spin contamination by which the calculated value of total spin operator  $\langle S^2 \rangle$  is compared to  $s(s+1)$ , where *s* is 1/2 the number of unpaired electrons. The results have indicated that  $\langle S^2 \rangle = 2.0$  for optimized triplet structures and  $\langle S^2 \rangle = 6.0$  for optimized quintets structures.

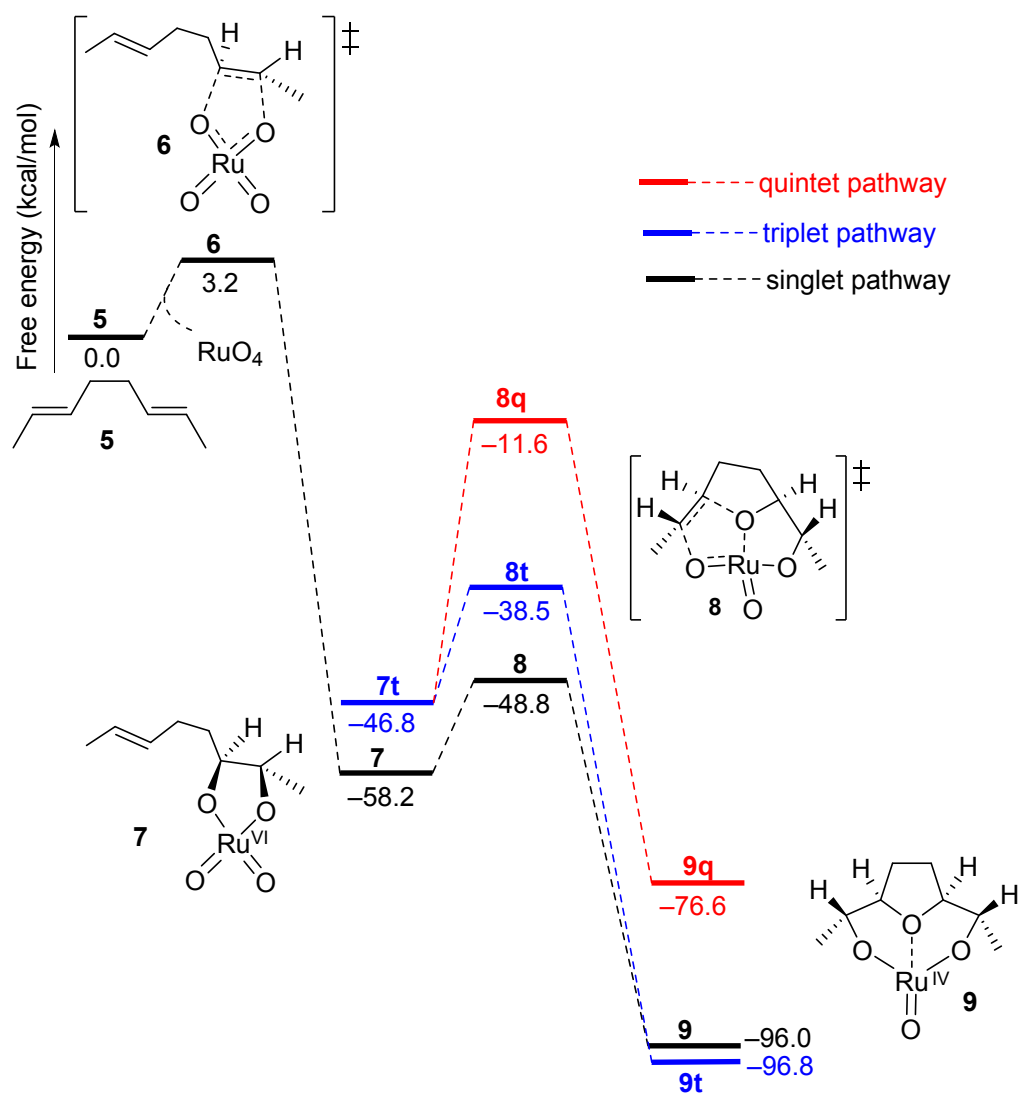

**Fig. ES11** Oxidative cyclisation of 1,5-diene **5** by  $\text{RuO}_4$  without any additives, showing high spin cyclisation. t for triplet and q for quintet.

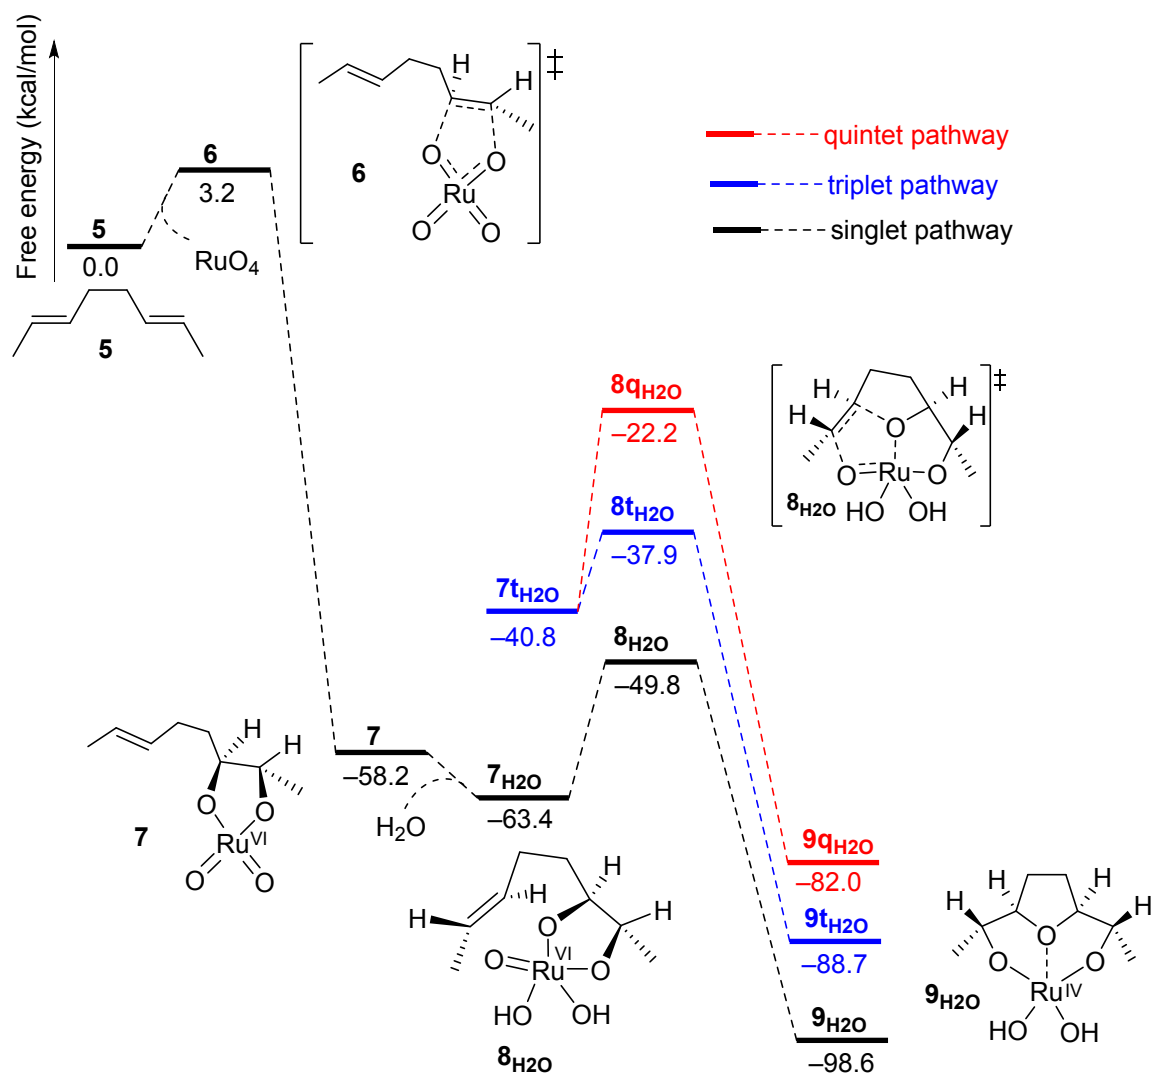

**Fig. ES12** Oxidative cyclisation of 1,5-diene **5** by  $\text{RuO}_4$  with water added to Ru(VI) glycolate **7**, showing high spin cyclisation. t for triplet and q for quintet.

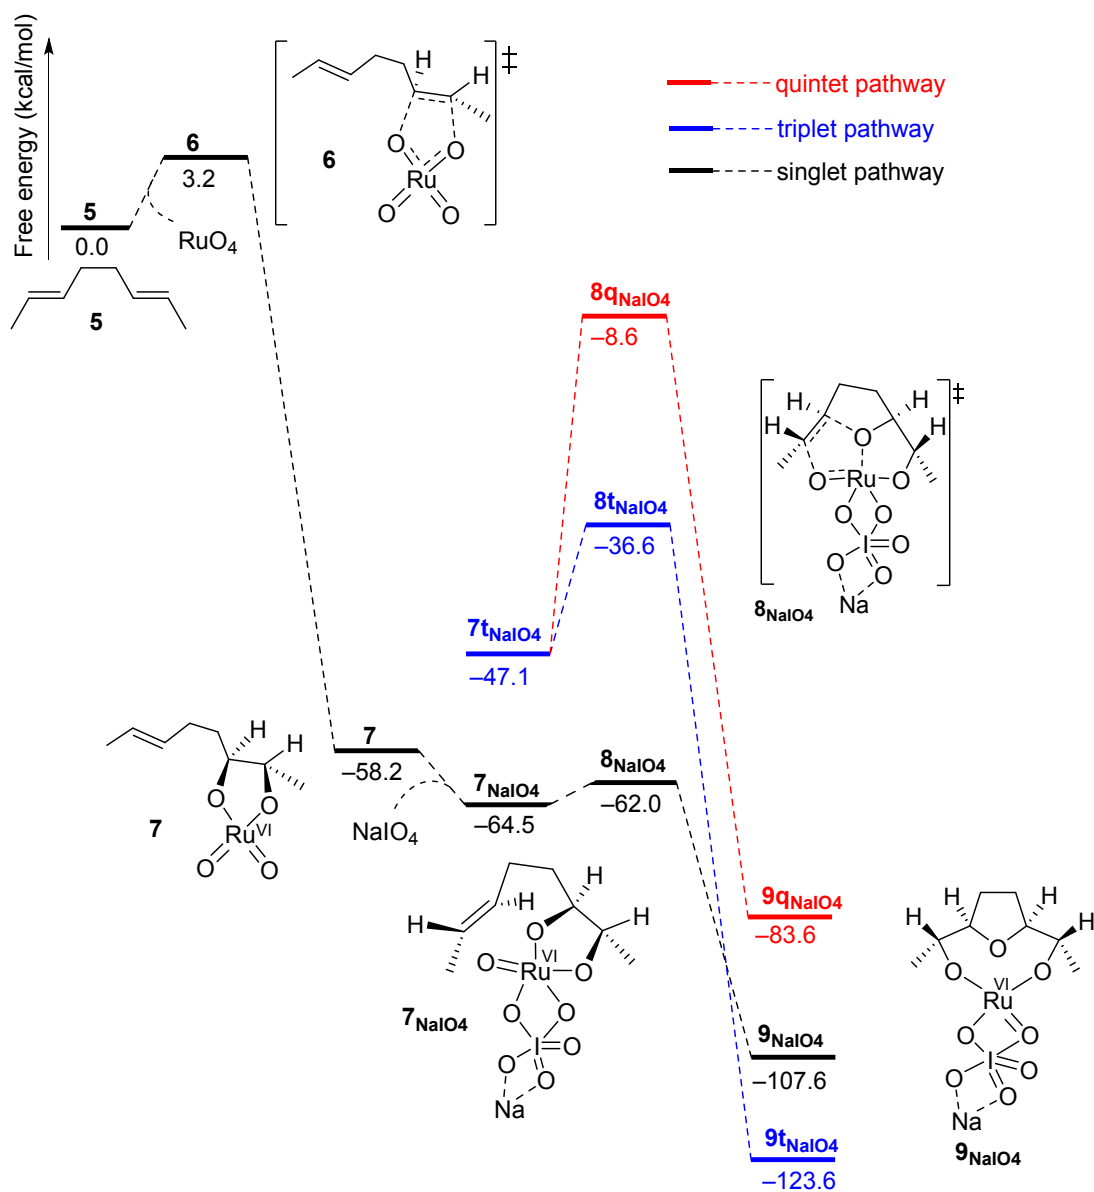

**Fig. ES13** Oxidative cyclisation of 1,5-diene **5** by  $\text{RuO}_4$  with  $\text{NaIO}_4$  added to Ru(VI) glycolate **7**, showing high spin cyclisation. t for triplet and q for quintet.

## 2.1. Hydrolysis pathways considered for $9_{[\text{ox}]}$

Fig. ESI4 shows hydrolysis via Ru(VI) and Ru(VIII) competed with entering second cycle pathway. The results indicate a favourability of hydrolysis through Ru(VI) and outpace other pathways.

More importantly, the calculated barrier for proton transfer from OH ligand to glycolate bond of intermediate **18** to release THF-diol **15** was found to be very high of 21.7 kcal/mol via TS **22**. However, proton transfer process involving electronegative atoms are obviously fast and diffusion controlled, and therefore proton transfer is more likely to proceed through intermediate **19** as a slightly endergonic step ( $\Delta G_r = 6.3$  kcal/mol).

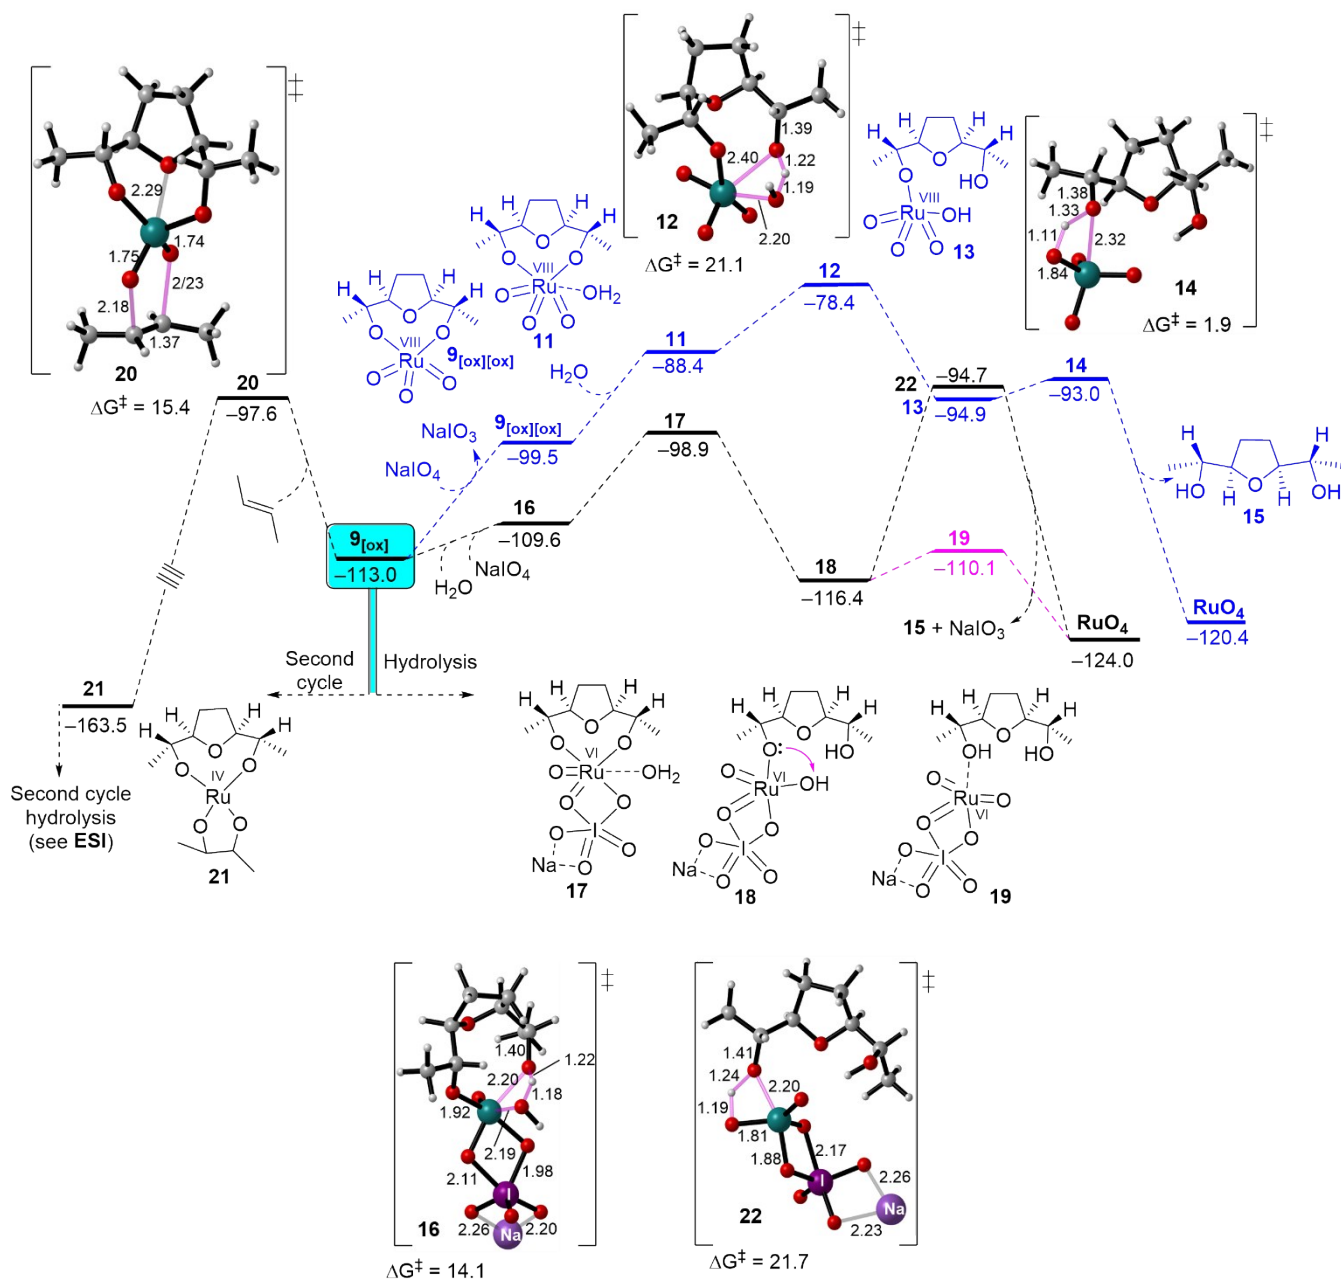

**Fig. ESI4** Free energy evaluations for divergent reactions of  $9_{[\text{ox}]}$ , showing hydrolysis via Ru(VI) or Ru(VIII) or entering second cycle through another ruthenylation. *E*-but-2-ene was used as a model for **5** to reduce computational cost.

## 2.4 Reoxidation of Ru(IV)→Ru(VI) bisglycolate intermediate and hydrolysis to release either THF-diol or vicinal diol

Fig. ES15 show DFT simulations on intermolecular ruthenylation of **9**<sub>[ox]</sub> and their mechanism of THF-diol **15** and vicinal diol **22** release. The results indicated that even the Ru(IV) tetraester **21** was formed, which is unlikely as shown in Fig. ES14, reoxidation to Ru(VI) tetraester **21**<sub>[ox]</sub> and the latter prefer hydrolysis to release THF-diol **15** rather than to vicinal diol **32**.

Here, we have also considered a stepwise THF-diol or vicinal diol release for the second glycolate bond (see intermediates **25** and **30**) rather than proceeding through TSs **26** and **31**, likely to intermediate **18**.

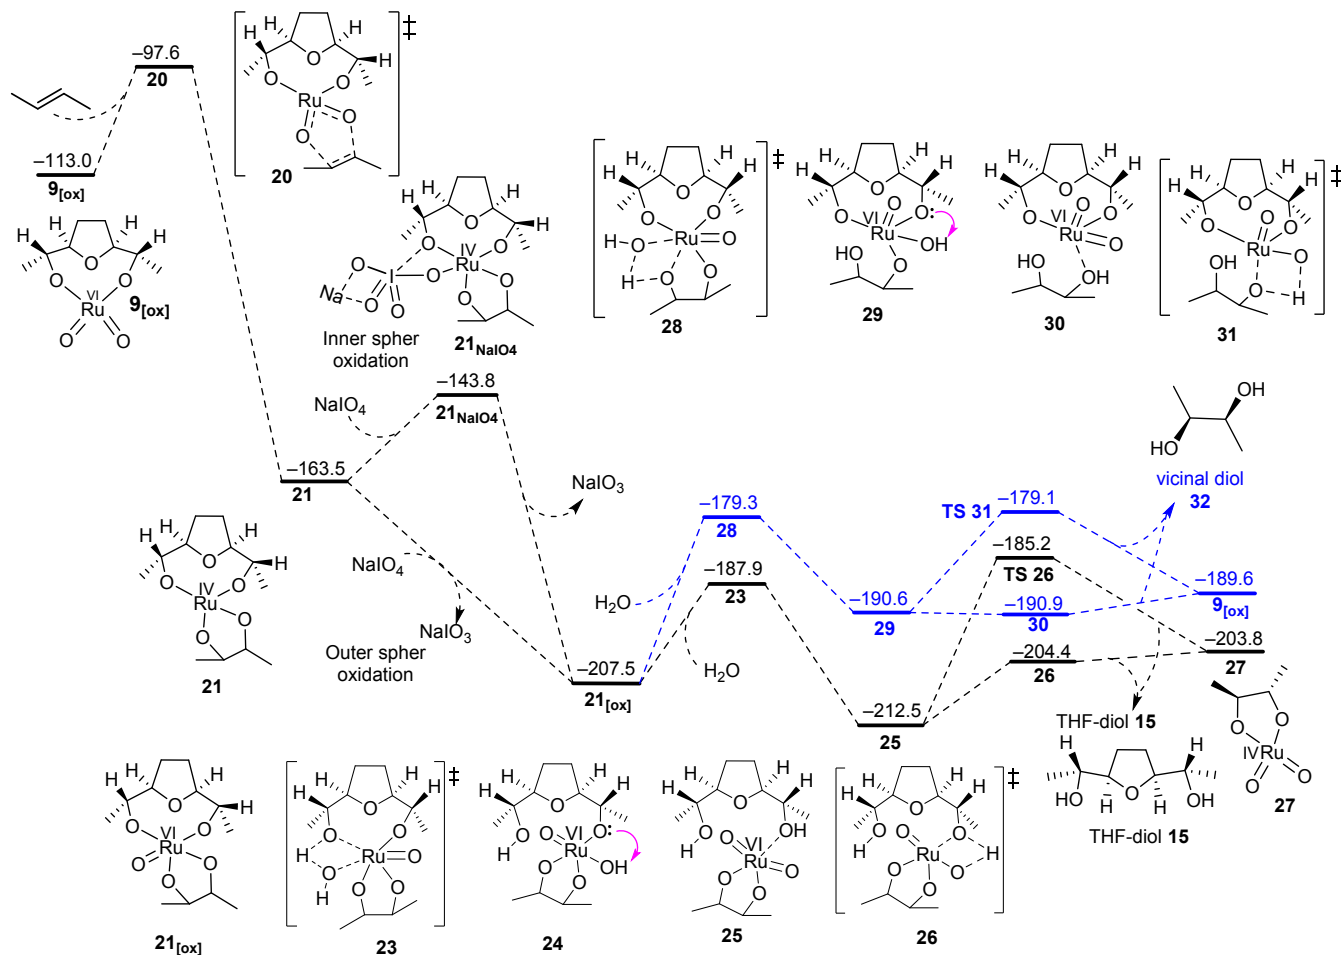

**Fig. ES15** Free energy evaluations for intermolecular ruthenylation of **9**<sub>[ox]</sub> with *E*-but-2-ene (was used as a model for **5** to reduce computational cost), showing reoxidation Ru(IV)→Ru(VI) and hydrolysis to either release THF-diol (**15**, favourable) or vicinal diol (**32**, disfavourable, blue pathway). *E*-but-2-ene was used as a model for **5** to reduce computational cost.

### 3 Absolute energies and cartesian coordinates

(a) The cartesian coordinates, electronic energies and free energies for the Ru-catalysed oxidative cyclisation of symmetric 1,5-diene (**5**). All energies are in Hartree. Here, t and q refer to triplet and quintet spin multiplicity, respectively.

**5**

|   |            |            |            |
|---|------------|------------|------------|
| C | 1.4931369  | 0.0609484  | 0.3782998  |
| C | 2.7700589  | 0.1360594  | -0.0052802 |
| H | 3.1880929  | 1.1293954  | -0.2266392 |
| H | 1.0765419  | -0.9312656 | 0.6076148  |
| C | 3.6900959  | -1.0265906 | -0.1535162 |
| C | 0.5739619  | 1.2317904  | 0.5103848  |
| H | 0.1320679  | 1.2492614  | 1.5249678  |
| H | 1.1564419  | 2.1636414  | 0.3996958  |
| C | -0.5739791 | 1.2317814  | -0.5104282 |
| H | 4.5659549  | -0.9388396 | 0.5122578  |
| H | 3.1795839  | -1.9740206 | 0.0808628  |
| H | 4.0890939  | -1.1002596 | -1.1798702 |
| H | -1.1564661 | 2.1636284  | -0.3997442 |
| H | -0.1320871 | 1.2492484  | -1.5250122 |
| C | -1.4931451 | 0.0609334  | -0.3783312 |
| C | -2.7700531 | 0.1360344  | 0.0052978  |
| H | -1.0765551 | -0.9312766 | -0.6076732 |
| C | -3.6900811 | -1.0266206 | 0.1535528  |
| H | -3.1880831 | 1.1293654  | 0.2266858  |
| H | -4.5659541 | -0.9388746 | -0.5122032 |
| H | -3.1795691 | -1.9740486 | -0.0808372 |
| H | -4.0890581 | -1.1002916 | 1.1799148  |

$E_{\text{THF}} = -313.007243192$   
 $G_{\text{THF}} = -312.847811$

**RuO<sub>4</sub>**

|    |            |            |            |
|----|------------|------------|------------|
| O  | 0.9837000  | 0.9837000  | 0.9837000  |
| O  | -0.9837000 | -0.9837000 | 0.9837000  |
| O  | -0.9837000 | 0.9837000  | -0.9837000 |
| O  | 0.9837000  | -0.9837000 | -0.9837000 |
| Ru | 0.0000000  | 0.0000000  | 0.0000000  |

$E_{\text{THF}} = -394.515807243$   
 $G_{\text{THF}} = -394.530558$

**6**

|   |            |            |            |
|---|------------|------------|------------|
| C | 1.3487797  | 1.1568639  | 0.3261875  |
| H | 1.1857607  | 1.1233209  | 1.4089425  |
| O | 0.1648647  | -0.8494801 | 0.8687285  |
| O | 0.9584467  | -3.5473911 | 0.4330375  |
| O | -1.0647213 | -2.1915901 | -1.1571975 |
| C | 0.4073607  | 1.9805589  | -0.4999735 |



|    |            |            |            |
|----|------------|------------|------------|
| H  | 0.0766967  | 2.8454799  | 0.1039405  |
| H  | 0.9587287  | 2.3921069  | -1.3633225 |
| C  | -0.8316133 | 1.2540069  | -1.0289225 |
| H  | -1.4243663 | 1.9779169  | -1.6201165 |
| H  | -0.5247833 | 0.4725559  | -1.7502125 |
| C  | -1.6934603 | 0.6418469  | 0.0317475  |
| H  | -1.5545303 | 0.9893479  | 1.0649995  |
| O  | 1.6390767  | -1.3258421 | -1.2759395 |
| C  | 2.4891777  | 0.5904709  | -0.1613455 |
| H  | 2.7634157  | 0.7902309  | -1.2038795 |
| C  | -2.6466973 | -0.2799581 | -0.2135915 |
| H  | -2.8388293 | -0.5684731 | -1.2544495 |
| Ru | 0.4284217  | -2.0994511 | -0.3083085 |
| C  | -3.4707183 | -0.9316871 | 0.8370865  |
| H  | -3.1879753 | -0.5856601 | 1.8435655  |
| H  | -4.5476613 | -0.7400901 | 0.6910725  |
| H  | -3.3431023 | -2.0271451 | 0.8022505  |
| C  | 3.4750687  | -0.1262091 | 0.6896035  |
| H  | 3.0453237  | -0.3697691 | 1.6742085  |
| H  | 3.8096027  | -1.0610351 | 0.2127015  |
| H  | 4.3777347  | 0.4890739  | 0.8491865  |

$E_{\text{THF}} = -707.540125386$   
 $G_{\text{THF}} = -707.373114$

**7**

|    |            |            |            |
|----|------------|------------|------------|
| C  | -2.0122386 | 0.0241647  | -0.5396084 |
| C  | -2.8951396 | -0.6266943 | 0.2225866  |
| H  | -3.2747786 | -0.1235943 | 1.1251666  |
| H  | -1.6249566 | -0.4700643 | -1.4402374 |
| O  | 0.8346774  | -0.2878273 | -0.9747544 |
| O  | 2.4793234  | -2.7331573 | -0.7812054 |
| O  | 2.2228274  | -0.5262153 | 1.1383976  |
| C  | -3.4064056 | -1.9995333 | -0.0434424 |
| C  | -1.4686846 | 1.3814427  | -0.2066034 |
| H  | -1.3507236 | 1.9875007  | -1.1245764 |
| H  | -2.2022146 | 1.9133807  | 0.4241946  |
| C  | -0.1369636 | 1.3547207  | 0.5452136  |
| H  | -3.1608766 | -2.6829293 | 0.7872496  |
| H  | -4.5048366 | -2.0134923 | -0.1479834 |
| H  | -2.9676156 | -2.4173433 | -0.9635214 |
| H  | 0.0769384  | 2.3580567  | 0.9581806  |
| H  | -0.2122296 | 0.6672477  | 1.4092916  |
| C  | 1.0632614  | 0.9584547  | -0.2968924 |
| C  | 2.3241984  | 0.7720127  | 0.5247936  |
| H  | 1.2146374  | 1.6984707  | -1.1090444 |
| C  | 3.5960764  | 0.8561877  | -0.2878344 |
| H  | 2.3541794  | 1.4852437  | 1.3712146  |
| H  | 4.4634504  | 0.5763267  | 0.3273216  |
| H  | 3.5487064  | 0.1729757  | -1.1522554 |
| H  | 3.7489274  | 1.8802157  | -0.6638734 |
| O  | -0.0418106 | -2.4024743 | 0.8443976  |
| Ru | 1.3322704  | -1.8030773 | 0.0538256  |

E<sub>THF</sub> = -707.644755923

G<sub>THF</sub> = -707.470910

**7<sub>H2O</sub>**

|    |            |            |            |
|----|------------|------------|------------|
| C  | 2.2430355  | 0.2082816  | 0.4607478  |
| H  | 1.7883075  | -0.2727334 | 1.3371548  |
| O  | -0.6375325 | -0.0120874 | 0.9557008  |
| O  | -2.2037085 | -0.1270404 | -1.0025642 |
| C  | 1.7514725  | 1.5753536  | 0.0965618  |
| H  | 1.6977825  | 2.2183276  | 0.9960828  |
| H  | 2.4820315  | 2.0489306  | -0.5827272 |
| C  | 0.3845515  | 1.5855506  | -0.5929812 |
| H  | 0.1903275  | 2.5927816  | -1.0070422 |
| H  | 0.3931865  | 0.8911886  | -1.4558532 |
| C  | -0.7864805 | 1.2484006  | 0.3123458  |
| H  | -0.8498825 | 1.9930826  | 1.1327428  |
| C  | 3.1419785  | -0.4751964 | -0.2521122 |
| H  | 3.5897495  | 0.0089836  | -1.1335352 |
| C  | -2.1167315 | 1.1766346  | -0.4329222 |
| H  | -2.1095155 | 1.8840006  | -1.2865412 |
| Ru | -1.0999615 | -1.4699724 | -0.1920992 |
| O  | 0.1948035  | -1.8917504 | -1.1532882 |
| O  | -2.6057475 | -2.5967774 | -0.5637002 |
| H  | -3.1535585 | -2.1212564 | -1.2143282 |
| O  | -1.0738885 | -2.4686804 | 1.4167978  |
| H  | -1.6821085 | -3.2186544 | 1.2651808  |
| C  | -3.3153105 | 1.4165876  | 0.4560878  |
| H  | -3.3370135 | 2.4575986  | 0.8155348  |
| H  | -4.2478415 | 1.2174686  | -0.0918092 |
| H  | -3.2732475 | 0.7471566  | 1.3315318  |
| C  | 3.5727645  | -1.8702074 | 0.0424568  |
| H  | 4.6609855  | -1.9394714 | 0.2119838  |
| H  | 3.0581535  | -2.2643424 | 0.9331828  |
| H  | 3.3433985  | -2.5421584 | -0.8025882 |

E<sub>THF</sub> = -784.084545408

G<sub>THF</sub> = -783.888283

**7<sub>NaIO4</sub>**

|   |            |            |            |
|---|------------|------------|------------|
| C | 1.7401698  | 1.9669497  | 0.1138855  |
| H | 1.7689968  | 2.0111377  | -0.9817905 |
| O | 0.6524898  | -0.2424173 | -0.7167065 |
| O | -0.2173642 | -2.1014403 | 0.7383375  |
| C | 2.7586468  | 1.1064137  | 0.7973285  |
| H | 3.6635658  | 1.0304567  | 0.1687715  |
| H | 3.0731558  | 1.5775007  | 1.7454065  |
| C | 2.2489088  | -0.3034433 | 1.1063095  |
| H | 3.0637368  | -0.9214713 | 1.5247105  |
| H | 1.4613758  | -0.2547663 | 1.8811095  |
| C | 1.6922668  | -0.9976713 | -0.1255795 |
| H | 2.4863488  | -1.1093283 | -0.8928205 |
| C | 0.7939358  | 2.6835367  | 0.7515275  |

|    |            |            |            |
|----|------------|------------|------------|
| H  | 0.7914318  | 2.6875637  | 1.8511505  |
| C  | 1.0678608  | -2.3602733 | 0.1845925  |
| H  | 1.6466868  | -2.8705583 | 0.9802885  |
| Ru | -1.0299962 | -0.4624963 | 0.2101165  |
| O  | -0.9793002 | 0.8232027  | 1.2982015  |
| O  | -2.7390412 | -1.3287143 | 0.5476625  |
| C  | 0.9299958  | -3.2414683 | -1.0356455 |
| H  | 1.9180108  | -3.5340103 | -1.4252435 |
| H  | 0.3675228  | -4.1522393 | -0.7851095 |
| H  | 0.3850318  | -2.7038273 | -1.8293955 |
| C  | -0.2201892 | 3.5257067  | 0.0615585  |
| H  | -0.0736542 | 4.5972087  | 0.2843555  |
| H  | -0.1740592 | 3.3901287  | -1.0302915 |
| H  | -1.2415782 | 3.2724597  | 0.3906885  |
| I  | -3.8921842 | -0.7653533 | -0.9601795 |
| O  | -3.9164752 | -1.7940373 | -2.4242805 |
| O  | -5.3791892 | -1.2204613 | 0.0026505  |
| O  | -4.4203252 | 0.9806087  | -1.1380805 |
| O  | -1.9006132 | -0.0557403 | -1.3498475 |
| Na | -6.3261692 | 0.7668447  | 0.0563185  |

$E_{\text{THF}} = -1181.96155653$   
 $G_{\text{THF}} = -1181.785427$

**7t<sub>NaIO4</sub>**

|    |            |            |            |
|----|------------|------------|------------|
| C  | 1.9084075  | 1.7379575  | -0.4882315 |
| H  | 1.2430735  | 1.4761325  | -1.3209215 |
| O  | 0.4730745  | -0.8091685 | -0.9920215 |
| O  | -0.5007335 | -1.8871505 | 1.0487045  |
| C  | 2.8733825  | 0.6889225  | -0.0352815 |
| H  | 3.4360185  | 0.2840675  | -0.8989285 |
| H  | 3.6182765  | 1.1526315  | 0.6353525  |
| C  | 2.2127565  | -0.4770525 | 0.7052565  |
| H  | 2.9890045  | -1.0695325 | 1.2249655  |
| H  | 1.5400825  | -0.0834735 | 1.4906055  |
| C  | 1.4494555  | -1.4353615 | -0.1937525 |
| H  | 2.1617375  | -1.9179915 | -0.8983355 |
| C  | 1.7756745  | 2.9336975  | 0.0919645  |
| H  | 2.4419255  | 3.1883385  | 0.9302525  |
| C  | 0.6980545  | -2.5165715 | 0.5931835  |
| H  | 1.2643125  | -2.7959015 | 1.5041315  |
| Ru | -1.2140455 | -0.5264885 | -0.0480205 |
| O  | -0.9678345 | 1.1149745  | 0.4438785  |
| O  | -3.0412275 | -0.6395915 | 1.0700235  |
| C  | 0.3589855  | -3.7358005 | -0.2300425 |
| H  | 1.2703665  | -4.2938915 | -0.4978175 |
| H  | -0.3080455 | -4.4056385 | 0.3318745  |
| H  | -0.1504565 | -3.4319795 | -1.1599315 |
| C  | 0.7618315  | 3.9523185  | -0.2985565 |
| H  | 1.2274905  | 4.9112545  | -0.5854245 |
| H  | 0.1486555  | 3.5961995  | -1.1412905 |
| H  | 0.0785445  | 4.1713155  | 0.5407525  |
| I  | -4.4727015 | -0.3752625 | -0.0827115 |

|    |            |            |            |
|----|------------|------------|------------|
| O  | -5.0708365 | -1.8004965 | -0.9771885 |
| O  | -5.7261475 | 0.1609835  | 1.1180735  |
| O  | -4.3939625 | 1.2142655  | -0.9698275 |
| O  | -2.3194525 | -0.7096035 | -1.3929885 |
| Na | -5.7656655 | 2.3278955  | 0.4822545  |

$E_{\text{THF}} = -1181.93078492$   
 $G_{\text{THF}} = -1181.757686$

**7<sub>[ox]</sub>**

|    |            |            |            |
|----|------------|------------|------------|
| C  | 2.0320542  | 0.2328694  | 0.3511352  |
| C  | 2.5423352  | -0.8362596 | -0.2949138 |
| H  | 2.6901052  | -0.7679666 | -1.3796648 |
| H  | 1.9144502  | 0.1797634  | 1.4372172  |
| O  | -0.5382978 | -0.1005006 | 0.8231942  |
| O  | -1.2510688 | -2.4884706 | 1.3848212  |
| O  | -2.2503808 | -0.3301336 | -0.9260468 |
| C  | 2.9954432  | -2.0949556 | 0.3709902  |
| C  | 1.6195752  | 1.5053474  | -0.3369858 |
| H  | 1.7186642  | 2.3510404  | 0.3614462  |
| H  | 2.2970392  | 1.7032254  | -1.1818928 |
| C  | 0.1799002  | 1.4630084  | -0.8705918 |
| H  | 2.5262332  | -2.9700026 | -0.1040348 |
| H  | 4.0861222  | -2.2163746 | 0.2738192  |
| H  | 2.7367482  | -2.0941356 | 1.4389012  |
| H  | -0.0862948 | 2.4331204  | -1.3213468 |
| H  | 0.0995232  | 0.6992294  | -1.6623138 |
| C  | -0.8245378 | 1.1302384  | 0.2263812  |
| C  | -2.2503588 | 0.9378744  | -0.3096258 |
| H  | -0.8146618 | 1.8996114  | 1.0213392  |
| C  | -3.3092848 | 1.0148814  | 0.7746792  |
| H  | -2.4558618 | 1.6562154  | -1.1233298 |
| H  | -4.2830208 | 0.7122544  | 0.3681552  |
| H  | -3.0437488 | 0.3400074  | 1.6033042  |
| H  | -3.3895548 | 2.0383124  | 1.1686572  |
| O  | 0.3736822  | -1.9653576 | -0.8551818 |
| Ru | -1.1422348 | -1.7423376 | -0.1257548 |
| O  | -2.1725708 | -2.6905046 | -1.1123568 |

$E_{\text{THF}} = -782.744546776$   
 $G_{\text{THF}} = -782.566809$

**7<sub>t</sub>**

|   |            |            |            |
|---|------------|------------|------------|
| C | 1.9632103  | 0.2940514  | 0.5227880  |
| C | 2.8340103  | -0.3965256 | -0.2190520 |
| H | 3.1223563  | 0.0117754  | -1.2000020 |
| H | 1.6670073  | -0.1088416 | 1.5000460  |
| O | -0.8222827 | -0.3737426 | 0.9240800  |
| O | -1.3896437 | -2.9931286 | 0.9918540  |
| O | -2.2083767 | -0.7038226 | -1.1266730 |
| C | 3.4432193  | -1.6971086 | 0.1718250  |
| C | 1.3132993  | 1.5677324  | 0.0724380  |
| H | 1.1656133  | 2.2508274  | 0.9293630  |

|    |            |            |            |
|----|------------|------------|------------|
| H  | 1.9867753  | 2.0904684  | -0.6291430 |
| C  | -0.0287937 | 1.3626804  | -0.6338310 |
| H  | 3.2072943  | -2.4816336 | -0.5668710 |
| H  | 4.5436283  | -1.6332696 | 0.2260840  |
| H  | 3.0688373  | -2.0332576 | 1.1519700  |
| H  | -0.3768697 | 2.3223184  | -1.0582860 |
| H  | 0.1054623  | 0.6737634  | -1.4897290 |
| C  | -1.1335347 | 0.8459674  | 0.2704150  |
| C  | -2.4392627 | 0.5509364  | -0.4886200 |
| H  | -1.3069077 | 1.5744494  | 1.0907050  |
| C  | -3.6482587 | 0.4735694  | 0.4122080  |
| H  | -2.5924387 | 1.2897464  | -1.2994810 |
| H  | -4.5271277 | 0.1357404  | -0.1556470 |
| H  | -3.4646327 | -0.2385756 | 1.2333460  |
| H  | -3.8735857 | 1.4593044  | 0.8487810  |
| O  | 0.3693803  | -2.3705566 | -1.1946870 |
| Ru | -0.9783787 | -1.8728676 | -0.2838820 |

$E_{\text{THF}} = -707.622806270$

$G_{\text{THF}} = -707.452549$

#### $7t_{\text{H}_2\text{O}}$

|    |            |            |            |
|----|------------|------------|------------|
| C  | 2.2940895  | -0.1742678 | 0.4489075  |
| H  | 1.6308715  | -0.7460078 | 1.1101745  |
| O  | -0.6176675 | 0.1135712  | 0.9833025  |
| O  | -2.0788475 | 0.1217482  | -1.0761065 |
| C  | 1.9656735  | 1.2715152  | 0.2462165  |
| H  | 1.9058665  | 1.7942032  | 1.2211475  |
| H  | 2.7897875  | 1.7495062  | -0.3120235 |
| C  | 0.6601025  | 1.5087672  | -0.5144945 |
| H  | 0.6447175  | 2.5353772  | -0.9252165 |
| H  | 0.5993355  | 0.8180442  | -1.3776015 |
| C  | -0.6030715 | 1.3468312  | 0.3244645  |
| H  | -0.6247785 | 2.1392062  | 1.1057615  |
| C  | 3.2993415  | -0.8085178 | -0.1595185 |
| H  | 3.9567365  | -0.2323078 | -0.8283615 |
| C  | -1.8821225 | 1.4234882  | -0.5080915 |
| H  | -1.7421085 | 2.1065232  | -1.3684135 |
| Ru | -1.5921505 | -1.3329248 | 0.0346815  |
| O  | -0.1548285 | -2.2400178 | -0.1847065 |
| O  | -2.6682585 | -2.4530368 | -1.1481205 |
| H  | -3.2359505 | -1.8667768 | -1.6764795 |
| O  | -2.6325725 | -1.8491898 | 1.5053045  |
| H  | -3.2308005 | -2.5562648 | 1.1953195  |
| C  | -3.0991485 | 1.8128952  | 0.2984985  |
| H  | -3.0208815 | 2.8568342  | 0.6410975  |
| H  | -4.0136315 | 1.7138052  | -0.3045185 |
| H  | -3.1900455 | 1.1647452  | 1.1870575  |
| C  | 3.5978395  | -2.2601468 | -0.0058475 |
| H  | 4.6138285  | -2.4292158 | 0.3912405  |
| H  | 2.8771065  | -2.7435658 | 0.6719915  |
| H  | 3.5515675  | -2.7848198 | -0.9756645 |

$E_{\text{THF}} = -784.045922537$

G<sub>THF</sub> = -783.852250

**8**

|    |            |            |            |
|----|------------|------------|------------|
| C  | -1.7299792 | 0.4569954  | -0.4210914 |
| H  | -1.7725282 | 0.3810264  | -1.5120514 |
| O  | 0.3646678  | -0.2176656 | -0.7691854 |
| O  | -0.9091292 | -1.6535106 | 1.0911996  |
| O  | 1.9932598  | -0.8225796 | 1.1200906  |
| C  | -1.2352522 | 1.7368364  | 0.1741426  |
| H  | -1.1792342 | 2.5114264  | -0.6092164 |
| H  | -1.9456372 | 2.0982894  | 0.9388656  |
| C  | 0.1467008  | 1.5616884  | 0.8079696  |
| H  | 0.5590468  | 2.5310134  | 1.1374616  |
| H  | 0.0809198  | 0.9128134  | 1.6998136  |
| C  | 1.0635858  | 0.9011524  | -0.2082334 |
| H  | 1.2762448  | 1.5965364  | -1.0459754 |
| O  | 1.1367038  | -3.2701646 | -0.5275364 |
| Ru | 0.6311538  | -1.8487526 | 0.2477096  |
| C  | 2.3490568  | 0.3530414  | 0.3962696  |
| H  | 2.7471108  | 1.0647074  | 1.1493346  |
| C  | -2.3364442 | -0.5567316 | 0.3181596  |
| H  | -2.6200002 | -0.3051626 | 1.3470806  |
| C  | 3.4074678  | 0.0556684  | -0.6435074 |
| H  | 3.7644328  | 0.9802624  | -1.1251674 |
| H  | 4.2650728  | -0.4484786 | -0.1746284 |
| H  | 3.0031648  | -0.6091386 | -1.4256894 |
| C  | -3.1128422 | -1.6394066 | -0.3565804 |
| H  | -3.2108052 | -2.5181766 | 0.2960236  |
| H  | -4.1286652 | -1.2975216 | -0.6199954 |
| H  | -2.6080722 | -1.9541686 | -1.2852624 |

E<sub>THF</sub> = -707.630654506

G<sub>THF</sub> = -707.455962

**8<sub>H2O</sub>**

|    |            |            |            |
|----|------------|------------|------------|
| C  | -1.9756412 | 0.3040198  | -0.3334826 |
| H  | -2.0628772 | 0.2967328  | -1.4238606 |
| O  | 0.1365838  | 0.2370618  | -0.7529526 |
| O  | -0.5293632 | -1.6693982 | 1.0234664  |
| O  | 2.0631778  | 0.0396678  | 0.9763184  |
| C  | -1.8714062 | 1.6237638  | 0.3645204  |
| H  | -2.0691022 | 2.4407638  | -0.3492626 |
| H  | -2.6312832 | 1.6949178  | 1.1619374  |
| C  | -0.4721002 | 1.7947028  | 0.9522584  |
| H  | -0.3149252 | 2.8161458  | 1.3388144  |
| H  | -0.3190752 | 1.0966248  | 1.7956094  |
| C  | 0.5136658  | 1.4673668  | -0.1548726 |
| H  | 0.4724518  | 2.2585768  | -0.9335336 |
| Ru | 0.9557158  | -1.3010832 | 0.2381994  |
| C  | 1.9507868  | 1.3075108  | 0.3413894  |
| H  | 2.1561428  | 2.0656128  | 1.1247834  |

|   |            |            |            |
|---|------------|------------|------------|
| C | -2.2764642 | -0.8763482 | 0.3399964  |
| H | -2.5655392 | -0.7883712 | 1.3938874  |
| O | 2.2045228  | -2.6143892 | 1.0086094  |
| H | 1.9984068  | -3.5062192 | 0.6880544  |
| O | 1.2342218  | -2.1439602 | -1.4276326 |
| H | 1.8626198  | -2.8712932 | -1.2629736 |
| C | 2.9687068  | 1.4115338  | -0.7733546 |
| H | 2.9672158  | 2.4192648  | -1.2188166 |
| H | 3.9760488  | 1.1989388  | -0.3870916 |
| H | 2.7371928  | 0.6790368  | -1.5651656 |
| C | -2.6933632 | -2.1037982 | -0.3945656 |
| H | -2.5229602 | -3.0061752 | 0.2104334  |
| H | -3.7679862 | -2.0685152 | -0.6459776 |
| H | -2.1253722 | -2.2026922 | -1.3347346 |

$E_{\text{THF}} = -784.065460975$

$G_{\text{THF}} = -783.866579$

**$\delta_{[\text{ox}]}$**

|    |            |            |            |
|----|------------|------------|------------|
| C  | 1.9887446  | 0.2611839  | 0.3342100  |
| H  | 1.9091896  | 0.2438659  | 1.4243450  |
| O  | -0.4796404 | -0.0865591 | 0.7915990  |
| O  | 0.4366026  | -1.9446941 | -0.8783540 |
| O  | -2.2252474 | -0.3454261 | -0.9297080 |
| C  | 1.6021826  | 1.5266589  | -0.3790840 |
| H  | 1.7188546  | 2.3823209  | 0.3037450  |
| H  | 2.2807086  | 1.6933409  | -1.2298140 |
| C  | 0.1577906  | 1.4954599  | -0.9019440 |
| H  | -0.1142154 | 2.4705739  | -1.3370760 |
| H  | 0.0659816  | 0.7388619  | -1.6989260 |
| C  | -0.8174684 | 1.1396729  | 0.2140070  |
| H  | -0.8099244 | 1.9080869  | 1.0098090  |
| O  | -1.1772954 | -2.4937541 | 1.3644290  |
| Ru | -1.0878074 | -1.7414961 | -0.1453900 |
| C  | -2.2482614 | 0.9122789  | -0.2953080 |
| H  | -2.4933724 | 1.6377319  | -1.0916810 |
| C  | 2.4717766  | -0.8397891 | -0.2939070 |
| H  | 2.6197996  | -0.7962321 | -1.3790170 |
| O  | -2.0939274 | -2.7126041 | -1.1393450 |
| C  | -3.2827824 | 0.9441379  | 0.8150740  |
| H  | -3.3800714 | 1.9579979  | 1.2294670  |
| H  | -4.2576274 | 0.6231279  | 0.4257970  |
| H  | -2.9806744 | 0.2617989  | 1.6249600  |
| C  | 2.9517196  | -2.0675401 | 0.4092260  |
| H  | 2.5339596  | -2.9692351 | -0.0625900 |
| H  | 4.0492076  | -2.1432331 | 0.3464460  |
| H  | 2.6617966  | -2.0565361 | 1.4690300  |

$E_{\text{THF}} = -782.745269680$

$G_{\text{THF}} = -782.565999$

**$\delta_{\text{NaIO}_4}$**

|   |            |           |           |
|---|------------|-----------|-----------|
| C | -1.7692302 | 1.6246225 | 0.5061152 |
|---|------------|-----------|-----------|

|                                   |            |            |            |
|-----------------------------------|------------|------------|------------|
| H                                 | -1.7204272 | 1.5420315  | 1.5963482  |
| O                                 | -0.6633112 | -0.3297355 | 0.7189832  |
| O                                 | 0.1735918  | -1.8600055 | -1.1569258 |
| C                                 | -2.9083622 | 0.9623655  | -0.2009868 |
| H                                 | -3.7193572 | 0.7548245  | 0.5172572  |
| H                                 | -3.3198602 | 1.6373405  | -0.9715238 |
| C                                 | -2.4659682 | -0.3501115 | -0.8555968 |
| H                                 | -3.3338982 | -0.9273215 | -1.2177938 |
| H                                 | -1.8254752 | -0.1402155 | -1.7314188 |
| C                                 | -1.6728762 | -1.1508835 | 0.1618802  |
| H                                 | -2.3380132 | -1.4809035 | 0.9872932  |
| C                                 | -0.8865512 | 2.4887445  | -0.1083478 |
| H                                 | -1.1172442 | 2.8075555  | -1.1314508 |
| C                                 | -0.9479092 | -2.3588275 | -0.4394818 |
| H                                 | -1.6002492 | -2.8518325 | -1.1885838 |
| Ru                                | 0.9396918  | -0.2828675 | -0.4296128 |
| O                                 | 0.5616528  | 1.2491355  | -1.1068878 |
| O                                 | 2.6477678  | -0.7009565 | -1.3309178 |
| C                                 | -0.4951182 | -3.3495645 | 0.6095392  |
| H                                 | -1.3568192 | -3.8095995 | 1.1191482  |
| H                                 | 0.1031678  | -4.1458805 | 0.1440422  |
| H                                 | 0.1301628  | -2.8428905 | 1.3636992  |
| C                                 | 0.1309168  | 3.2587055  | 0.6577042  |
| H                                 | -0.2938692 | 4.2049115  | 1.0377452  |
| H                                 | 0.4937148  | 2.6754125  | 1.5199592  |
| H                                 | 0.9961238  | 3.5144545  | 0.0288802  |
| I                                 | 4.0043348  | -0.4684665 | 0.0604682  |
| O                                 | 4.4029668  | -1.8311785 | 1.1534052  |
| O                                 | 5.3517088  | -0.4427485 | -1.1772268 |
| O                                 | 4.3725668  | 1.2309335  | 0.6501752  |
| O                                 | 2.0534418  | -0.2154145 | 1.0030662  |
| Na                                | 6.0727298  | 1.5883665  | -0.7889538 |
| E <sub>THF</sub> = -1181.95971009 |            |            |            |
| G <sub>THF</sub> = -1181.781490   |            |            |            |

**8t<sub>NaIO4</sub>**

|   |            |            |            |
|---|------------|------------|------------|
| C | -1.5612435 | 1.6422128  | 0.5408423  |
| H | -1.5141035 | 1.5983598  | 1.6330853  |
| O | -0.7331705 | -0.5848482 | 0.8800853  |
| O | 0.1762835  | -2.0815872 | -0.9785197 |
| C | -2.7201055 | 1.0254748  | -0.1597967 |
| H | -3.5398345 | 0.8754028  | 0.5626713  |
| H | -3.0868405 | 1.7224538  | -0.9366557 |
| C | -2.3943065 | -0.3234242 | -0.8287097 |
| H | -3.3219905 | -0.7658422 | -1.2315397 |
| H | -1.7153035 | -0.1634802 | -1.6845637 |
| C | -1.7412255 | -1.2581342 | 0.1857613  |
| H | -2.5113875 | -1.5883772 | 0.9183503  |
| C | -0.5474645 | 2.3807788  | -0.1150827 |
| H | -0.7913025 | 2.7712048  | -1.1108647 |
| C | -1.0826495 | -2.4874002 | -0.4433287 |
| H | -1.6770605 | -2.8483102 | -1.3088057 |



|    |            |            |            |
|----|------------|------------|------------|
| Ru | 0.9046055  | -0.4524342 | -0.3283667 |
| O  | 0.4905715  | 1.0333058  | -1.1954747 |
| O  | 2.6191865  | -0.7939982 | -1.1819797 |
| C  | -0.8643055 | -3.6003342 | 0.5565613  |
| H  | -1.8240235 | -4.0272102 | 0.8899353  |
| H  | -0.2584935 | -4.4026312 | 0.1110123  |
| H  | -0.3308215 | -3.2045612 | 1.4364423  |
| C  | 0.5330395  | 3.0463198  | 0.6550023  |
| H  | 0.7854395  | 4.0266938  | 0.2261773  |
| H  | 0.2375305  | 3.1699488  | 1.7085373  |
| H  | 1.4661635  | 2.4484348  | 0.6618413  |
| I  | 3.9357695  | -0.0668862 | 0.1351613  |
| O  | 4.6949425  | -0.9961422 | 1.4693033  |
| O  | 5.2241845  | 0.0209988  | -1.1622517 |
| O  | 3.8482125  | 1.7644898  | 0.3237483  |
| O  | 1.9641675  | -0.0802102 | 1.0936263  |
| Na | 5.3355365  | 2.1997338  | -1.3222047 |

$E_{\text{THF}} = -1181.91582028$   
 $G_{\text{THF}} = -1181.740922$

**8t**

|    |            |            |            |
|----|------------|------------|------------|
| C  | -1.8697202 | 0.4315714  | -0.4668074 |
| H  | -1.9150992 | 0.2643484  | -1.5488964 |
| O  | 0.5977638  | -0.2479676 | -0.9396944 |
| O  | -0.9289182 | -1.8035776 | 0.8406336  |
| O  | 2.0450568  | -0.8516886 | 1.0783526  |
| C  | -1.2300822 | 1.6832294  | 0.0364076  |
| H  | -1.1008262 | 2.3941804  | -0.7974354 |
| H  | -1.9021242 | 2.1719094  | 0.7665266  |
| C  | 0.1244858  | 1.4543914  | 0.7146746  |
| H  | 0.5085188  | 2.4089274  | 1.1170766  |
| H  | 0.0020738  | 0.7719054  | 1.5758566  |
| C  | 1.1415238  | 0.8686604  | -0.2507104 |
| H  | 1.3829718  | 1.6174504  | -1.0352854 |
| O  | 1.0699128  | -3.1654816 | -0.8926804 |
| Ru | 0.7236948  | -1.8615016 | 0.1520816  |
| C  | 2.4049838  | 0.3798584  | 0.4459026  |
| H  | 2.6908328  | 1.0744104  | 1.2613296  |
| C  | -2.4092472 | -0.5447596 | 0.3593706  |
| H  | -2.5093952 | -0.2967996 | 1.4243796  |
| C  | 3.5630818  | 0.1662284  | -0.5009974 |
| H  | 3.9218298  | 1.1244974  | -0.9103314 |
| H  | 4.3975268  | -0.3254976 | 0.0199336  |
| H  | 3.2495828  | -0.4746786 | -1.3419584 |
| C  | -3.3087422 | -1.6059126 | -0.1715934 |
| H  | -3.3217942 | -2.4846706 | 0.4878476  |
| H  | -4.3423132 | -1.2247576 | -0.2489084 |
| H  | -2.9855782 | -1.9242756 | -1.1750734 |

$E_{\text{THF}} = -707.610606792$   
 $G_{\text{THF}} = -707.439343$

**8t<sub>H2O</sub>**

|    |            |            |            |
|----|------------|------------|------------|
| C  | 2.2016932  | -0.3161098 | 0.1789267  |
| H  | 2.3316562  | -0.1114618 | 1.2480297  |
| O  | -0.0184178 | 0.1824652  | 0.6748877  |
| O  | -0.5836888 | -1.5852358 | -1.5463423 |
| O  | -2.1433568 | 0.8462202  | -0.6975763 |
| C  | 2.3144442  | 0.8223442  | -0.7791233 |
| H  | 2.9012532  | 1.6378712  | -0.3245963 |
| H  | 2.8523142  | 0.4978422  | -1.6870623 |
| C  | 0.9274212  | 1.3557922  | -1.1809513 |
| H  | 1.0153422  | 2.3450282  | -1.6614423 |
| H  | 0.4534212  | 0.6705432  | -1.9041563 |
| C  | 0.0804262  | 1.4332072  | 0.0779867  |
| H  | 0.5582612  | 2.1455142  | 0.7891247  |
| Ru | -1.5564228 | -0.9140298 | -0.3013013 |
| C  | -1.3786578 | 1.9067792  | -0.1646123 |
| H  | -1.3663188 | 2.7083632  | -0.9316103 |
| C  | 2.0174712  | -1.6124718 | -0.2008813 |
| H  | 1.9584912  | -1.8368668 | -1.2739563 |
| O  | -3.2988348 | -1.6249698 | -0.8697513 |
| H  | -3.1767898 | -2.5398518 | -1.1694033 |
| O  | -1.7472788 | -1.8930758 | 1.2965437  |
| H  | -2.6313738 | -2.3038578 | 1.2420907  |
| C  | -2.0150828 | 2.3992432  | 1.1175857  |
| H  | -1.5122878 | 3.3038912  | 1.4948637  |
| H  | -3.0759128 | 2.6322052  | 0.9455127  |
| H  | -1.9482238 | 1.6128862  | 1.8880397  |
| C  | 1.7766822  | -2.7156998 | 0.7501327  |
| H  | 0.7139142  | -3.0221988 | 0.6970157  |
| H  | 2.3707582  | -3.6110708 | 0.5035947  |
| H  | 1.9790962  | -2.4132958 | 1.7884327  |

E<sub>THF</sub> = -784.040177843

G<sub>THF</sub> = -783.847598

**8q**

|    |            |            |            |
|----|------------|------------|------------|
| C  | 2.0590580  | 0.4185126  | 0.6612087  |
| H  | 2.8146430  | 0.2695986  | 1.4461297  |
| O  | -1.0913360 | -0.3321514 | 1.3037307  |
| O  | 1.2703260  | -2.1231324 | 0.2736027  |
| O  | -1.5071210 | -0.8582294 | -1.1368313 |
| C  | 1.0203720  | 1.4422876  | 0.9781717  |
| H  | 0.6633810  | 1.2646016  | 2.0095817  |
| H  | 1.5570580  | 2.4102336  | 1.0358467  |
| C  | -0.1708670 | 1.5591206  | 0.0325627  |
| H  | -0.4496390 | 2.6187296  | -0.0927383 |
| H  | 0.1029450  | 1.2073566  | -0.9767763 |
| C  | -1.4173060 | 0.8044796  | 0.5136107  |
| H  | -2.0216010 | 1.4672216  | 1.1674477  |
| O  | -0.7661720 | -3.5209494 | 0.7583437  |
| Ru | -0.5987760 | -1.8636554 | 0.2287507  |
| C  | -2.2367420 | 0.2774576  | -0.6620283 |
| H  | -2.2533470 | 1.0223436  | -1.4845363 |

|   |            |            |            |
|---|------------|------------|------------|
| C | 2.2319240  | -0.3117884 | -0.4820473 |
| H | 1.5363790  | -0.1690044 | -1.3192953 |
| C | -3.6479140 | -0.1148184 | -0.2901133 |
| H | -4.2445310 | 0.7727916  | -0.0236983 |
| H | -4.1383260 | -0.6249064 | -1.1319933 |
| H | -3.6399540 | -0.7980504 | 0.5755607  |
| C | 3.4835380  | -1.0612344 | -0.7822703 |
| H | 4.0286810  | -1.3096404 | 0.1408187  |
| H | 3.2692190  | -1.9950204 | -1.3210863 |
| H | 4.1461070  | -0.4521524 | -1.4219513 |

$E_{\text{THF}} = -707.564976753$   
 $G_{\text{THF}} = -707.396510$

**8q<sub>H2O</sub>**

|    |            |            |            |
|----|------------|------------|------------|
| C  | 1.6401197  | 1.1171877  | 0.4451387  |
| H  | 1.7564697  | 0.9339147  | 1.5185557  |
| O  | -0.4981893 | 0.1186037  | 0.9950397  |
| O  | 0.8907827  | -1.0462593 | -1.3049413 |
| O  | -1.8280963 | -0.9297063 | -0.9281113 |
| C  | 0.8230937  | 2.2612177  | -0.0297193 |
| H  | 0.5755497  | 2.9263337  | 0.8134897  |
| H  | 1.4159897  | 2.8476357  | -0.7573033 |
| C  | -0.4715623 | 1.7958447  | -0.7146473 |
| H  | -1.0265463 | 2.6687157  | -1.0985873 |
| H  | -0.2373613 | 1.1428297  | -1.5737503 |
| C  | -1.3047583 | 1.0220257  | 0.3001447  |
| H  | -1.7401763 | 1.7395447  | 1.0319687  |
| Ru | -0.2202933 | -1.6204763 | -0.0125413 |
| C  | -2.4300983 | 0.1982517  | -0.3593163 |
| H  | -2.8840493 | 0.7996147  | -1.1778713 |
| C  | 2.3928757  | 0.3194547  | -0.4331323 |
| H  | 2.4261247  | 0.6259307  | -1.4851093 |
| O  | -0.3997323 | -3.4657103 | -0.5591693 |
| H  | -0.3084713 | -3.5631593 | -1.5200903 |
| O  | 0.9869897  | -2.1513513 | 1.4387347  |
| H  | 1.1445177  | -3.1059773 | 1.3494817  |
| C  | -3.4965403 | -0.1952233 | 0.6441317  |
| H  | -4.0400173 | 0.6858207  | 1.0236067  |
| H  | -4.2210503 | -0.8803333 | 0.1797247  |
| H  | -3.0306493 | -0.7103673 | 1.5014027  |
| C  | 3.3412927  | -0.6932473 | 0.0617457  |
| H  | 3.7932867  | -1.2726563 | -0.7524753 |
| H  | 4.1444857  | -0.2014683 | 0.6416777  |
| H  | 2.8060137  | -1.3669893 | 0.7619217  |

$E_{\text{THF}} = -784.014172522$   
 $G_{\text{THF}} = -783.822596$

**8q<sub>NaIO4</sub>**

|   |            |            |           |
|---|------------|------------|-----------|
| C | -1.7525814 | 1.5870458  | 0.4888344 |
| H | -1.8166104 | 1.6030778  | 1.5820804 |
| O | -0.7382224 | -0.2672302 | 0.6894694 |

|    |            |            |            |
|----|------------|------------|------------|
| O  | 0.1480536  | -1.8910192 | -1.1067186 |
| C  | -2.8794904 | 0.9526408  | -0.2657106 |
| H  | -3.7227664 | 0.7908658  | 0.4259454  |
| H  | -3.2305184 | 1.6433418  | -1.0522796 |
| C  | -2.4734694 | -0.3834082 | -0.8866726 |
| H  | -3.3566034 | -0.9362762 | -1.2469156 |
| H  | -1.8057014 | -0.2231412 | -1.7538816 |
| C  | -1.7000024 | -1.1626142 | 0.1632584  |
| H  | -2.3786174 | -1.4716862 | 0.9875614  |
| C  | -0.8741634 | 2.5153918  | -0.0854876 |
| H  | -0.8791744 | 2.6182748  | -1.1781826 |
| C  | -0.9694744 | -2.3759022 | -0.4148066 |
| H  | -1.6438254 | -2.8819672 | -1.1410396 |
| Ru | 1.0666506  | -0.3582602 | -0.2582976 |
| O  | 1.2196366  | 1.4675648  | -0.1316636 |
| O  | 2.7091946  | -0.4839022 | -1.4632166 |
| C  | -0.5535604 | -3.3622682 | 0.6593824  |
| H  | -1.4308614 | -3.8038002 | 1.1608764  |
| H  | 0.0410536  | -4.1720682 | 0.2124044  |
| H  | 0.0722566  | -2.8620842 | 1.4179344  |
| C  | -0.1899134 | 3.5471078  | 0.7269974  |
| H  | -0.8879154 | 4.3818168  | 0.9332094  |
| H  | 0.1322356  | 3.1309428  | 1.6941934  |
| H  | 0.6878696  | 3.9564348  | 0.2120654  |
| I  | 4.1747626  | -0.6639622 | -0.2592016 |
| O  | 4.6353636  | -2.2986332 | 0.3085824  |
| O  | 5.4033856  | -0.2183832 | -1.5356496 |
| O  | 4.5990816  | 0.7647218  | 0.8047164  |
| O  | 2.3305766  | -0.8206702 | 0.9714204  |
| Na | 6.0633516  | 1.6780508  | -0.6592076 |

$E_{\text{THF}} = -1181.86799996$   
 $G_{\text{THF}} = -1181.696370$

**9**

|   |            |            |            |
|---|------------|------------|------------|
| C | 1.2081653  | 0.7548328  | 0.2253810  |
| H | 1.5130933  | 1.2169108  | 1.1827140  |
| O | -0.0244587 | 0.0284908  | 0.4763500  |
| O | 1.5773913  | -1.1102832 | -1.1852860 |
| O | -1.7297887 | -1.0465712 | -1.1541020 |
| C | 0.8646463  | 1.8078858  | -0.8337100 |
| H | 1.1628173  | 2.8088978  | -0.4879740 |
| H | 1.4110853  | 1.6001108  | -1.7658410 |
| C | -0.6482107 | 1.6992708  | -1.0502180 |
| H | -1.1491877 | 2.6774218  | -1.0902520 |
| H | -0.8681327 | 1.1634058  | -1.9872480 |
| C | -1.1546017 | 0.8625108  | 0.1124750  |
| H | -1.4128327 | 1.4773518  | 0.9967240  |
| O | -0.1187197 | -3.5516552 | -0.3323980 |
| C | -2.2657157 | -0.1154452 | -0.2408880 |
| H | -3.0492917 | 0.4533198  | -0.7860230 |
| C | 2.2107173  | -0.3048032 | -0.2158870 |
| H | 3.0461733  | 0.2170738  | -0.7292690 |

|    |            |            |            |
|----|------------|------------|------------|
| C  | -2.8790467 | -0.7796562 | 0.9750650  |
| H  | -3.3919347 | -0.0453562 | 1.6175970  |
| H  | -3.6101687 | -1.5375542 | 0.6579960  |
| H  | -2.1006377 | -1.2829222 | 1.5736850  |
| C  | 2.7673613  | -1.1121292 | 0.9401500  |
| H  | 3.4059763  | -1.9213722 | 0.5561910  |
| H  | 3.3694033  | -0.4818012 | 1.6152260  |
| H  | 1.9519923  | -1.5693662 | 1.5273190  |
| Ru | -0.0860937 | -1.9085682 | -0.5977770 |

$E_{\text{THF}} = -707.710409087$   
 $G_{\text{THF}} = -707.531105$

**9<sub>H2O</sub>**

|    |            |            |            |
|----|------------|------------|------------|
| C  | 1.2343791  | -1.1244826 | 0.1608449  |
| H  | 1.8973621  | -1.4014856 | 1.0025899  |
| O  | 0.4578061  | 0.0229234  | 0.5715329  |
| O  | -0.7683039 | -1.7266256 | -0.9941991 |
| O  | -0.9201719 | 1.6411564  | -1.0093071 |
| C  | 2.0266941  | -0.6804756 | -1.0679561 |
| H  | 3.0587511  | -1.0576556 | -1.0225381 |
| H  | 1.5619931  | -1.0950576 | -1.9761521 |
| C  | 1.9578831  | 0.8508554  | -1.0742861 |
| H  | 2.9519061  | 1.3194414  | -1.0318551 |
| H  | 1.4586771  | 1.2145474  | -1.9859591 |
| C  | 1.1278781  | 1.2321694  | 0.1506989  |
| H  | 1.7626051  | 1.5752004  | 0.9899109  |
| C  | 0.0216111  | 2.2402264  | -0.1342001 |
| H  | 0.4761001  | 3.0821214  | -0.6968241 |
| C  | 0.2235601  | -2.2306686 | -0.1144961 |
| H  | 0.7520791  | -3.0331326 | -0.6700191 |
| O  | -3.3124509 | -0.1545506 | -1.2648361 |
| H  | -3.2487869 | -0.1550506 | -2.2300401 |
| O  | -2.5236749 | -0.1083346 | 1.1294219  |
| H  | -3.4501219 | -0.1512196 | 0.8151349  |
| C  | -0.6507609 | 2.7654424  | 1.1172949  |
| H  | 0.0741181  | 3.2918564  | 1.7588319  |
| H  | -1.4489949 | 3.4701274  | 0.8422329  |
| H  | -1.1063049 | 1.9439574  | 1.6936059  |
| C  | -0.3989199 | -2.8032406 | 1.1420379  |
| H  | -1.1298329 | -3.5799336 | 0.8738549  |
| H  | 0.3704521  | -3.2557506 | 1.7881349  |
| H  | -0.9273009 | -2.0211336 | 1.7109169  |
| Ru | -1.5282319 | -0.0712266 | -0.4743761 |

$E_{\text{THF}} = -784.147828776$   
 $G_{\text{THF}} = -783.944377$

**9<sub>NaIO4</sub>**

|   |            |            |            |
|---|------------|------------|------------|
| C | -1.5153033 | -1.0603548 | -0.6356011 |
| H | -1.4823133 | -1.4985428 | -1.6425111 |
| O | -0.7774283 | 0.1929372  | -0.7263441 |
| O | 0.4540247  | -1.6394078 | 0.7908849  |

|    |            |            |            |
|----|------------|------------|------------|
| O  | 0.3462137  | 1.5522712  | 1.2638259  |
| C  | -2.9180883 | -0.6375888 | -0.1952501 |
| H  | -3.5340233 | -0.3643678 | -1.0638431 |
| H  | -3.4297033 | -1.4381018 | 0.3550649  |
| C  | -2.6179633 | 0.6037982  | 0.6516759  |
| H  | -3.4986433 | 1.2331722  | 0.8303809  |
| H  | -2.1734443 | 0.3274272  | 1.6220249  |
| C  | -1.5733733 | 1.2986452  | -0.2040421 |
| H  | -2.0476173 | 1.7942682  | -1.0671291 |
| C  | -0.6004813 | 2.2683562  | 0.4785049  |
| H  | -1.1777123 | 2.8886472  | 1.1861129  |
| C  | -0.8544083 | -2.0159118 | 0.3914149  |
| H  | -1.4669513 | -2.0007948 | 1.3128329  |
| O  | 2.8023347  | 0.0135572  | 1.3788139  |
| C  | 0.1251607  | 3.1548132  | -0.5248391 |
| H  | -0.5858143 | 3.7776372  | -1.0870061 |
| H  | 0.8295327  | 3.8067452  | 0.0078899  |
| H  | 0.7022987  | 2.5390422  | -1.2333161 |
| C  | -0.8098923 | -3.4342848 | -0.1513941 |
| H  | -0.3941813 | -4.1100398 | 0.6063779  |
| H  | -1.8187283 | -3.7825858 | -0.4218581 |
| H  | -0.1682403 | -3.4664368 | -1.0442581 |
| Ru | 1.0769917  | 0.0759452  | 0.3696049  |
| I  | 4.1174307  | 0.3420462  | 0.0456449  |
| O  | 4.3994917  | 2.0303362  | -0.4646281 |
| O  | 2.2326487  | 0.3359052  | -0.9855441 |
| O  | 5.4889817  | -0.0504578 | 1.1770679  |
| O  | 4.5870527  | -0.9919918 | -1.1047141 |
| Na | 6.2821477  | -1.7446818 | 0.0841549  |

$E_{\text{THF}} = -1182.04195156$   
 $G_{\text{THF}} = -1181.854119$

**9t<sub>NaIO4</sub>**

|   |            |            |            |
|---|------------|------------|------------|
| C | -1.3058792 | -0.4396516 | -1.1841592 |
| H | -1.1414302 | -1.0317226 | -2.1009452 |
| O | -0.0044182 | 0.0521804  | -0.7988552 |
| O | -0.8980902 | -2.2575396 | 0.3637868  |
| O | 0.4209498  | -0.1049026 | 1.6922638  |
| C | -2.1104022 | 0.8299844  | -1.3932982 |
| H | -1.8824252 | 1.2631744  | -2.3802032 |
| H | -3.1963232 | 0.6605744  | -1.3388482 |
| C | -1.5872132 | 1.7239314  | -0.2730072 |
| H | -1.7169772 | 2.7968674  | -0.4772582 |
| H | -2.1069642 | 1.5039344  | 0.6753038  |
| C | -0.1147012 | 1.3370674  | -0.1731952 |
| H | 0.5234468  | 2.0208164  | -0.7633172 |
| C | 0.4498458  | 1.2184744  | 1.2676148  |
| H | -0.2409872 | 1.7655264  | 1.9465248  |
| C | -1.8556312 | -1.3486726 | -0.0845512 |
| H | -2.1691532 | -0.7051556 | 0.7715338  |
| O | 1.2943658  | -2.8959536 | 1.6946108  |
| C | 1.8209688  | 1.8759614  | 1.3803378  |

|    |            |            |            |
|----|------------|------------|------------|
| H  | 1.7246188  | 2.9689154  | 1.2683878  |
| H  | 2.2375818  | 1.6762574  | 2.3842128  |
| H  | 2.4966538  | 1.5125184  | 0.5886938  |
| C  | -3.0488062 | -2.1468776 | -0.5750252 |
| H  | -3.3987282 | -2.8161766 | 0.2235678  |
| H  | -3.8863122 | -1.4963526 | -0.8749152 |
| H  | -2.7541332 | -2.7694406 | -1.4356382 |
| Ru | 0.9493318  | -1.6348956 | 0.5579948  |
| I  | 3.8455728  | -0.9268726 | -0.9110082 |
| O  | 2.9453188  | -0.9300176 | 0.7840528  |
| O  | 1.5755538  | -2.0817126 | -1.0274422 |
| O  | 5.3964518  | -0.4000966 | -0.0602272 |
| O  | 3.2131058  | 0.6040604  | -1.6264822 |
| Na | 4.5248088  | 0.1757964  | 1.8794888  |

$E_{\text{THF}} = -1182.06177322$   
 $G_{\text{THF}} = -1181.879657$

### 9q<sub>NaIO4</sub>

|    |            |            |            |
|----|------------|------------|------------|
| C  | -1.2767970 | -1.1890150 | -0.6761689 |
| H  | -0.9272860 | -1.8636920 | -1.4775159 |
| O  | -0.5919140 | 0.0591790  | -0.8754639 |
| O  | 0.4805720  | -1.6828960 | 0.8547391  |
| O  | -0.0530280 | 1.2025500  | 1.3787341  |
| C  | -2.7496540 | -0.8304660 | -0.7673509 |
| H  | -3.0598870 | -0.7616410 | -1.8226609 |
| H  | -3.3977820 | -1.5681770 | -0.2703979 |
| C  | -2.7756780 | 0.5397730  | -0.1046969 |
| H  | -3.6411040 | 1.1517870  | -0.3979669 |
| H  | -2.7905000 | 0.4478380  | 0.9949581  |
| C  | -1.4610340 | 1.1626070  | -0.5507029 |
| H  | -1.5952890 | 1.7517050  | -1.4782049 |
| C  | -0.7724500 | 2.0428720  | 0.5097181  |
| H  | -1.5694960 | 2.5204460  | 1.1180521  |
| C  | -0.8940710 | -1.8147430 | 0.6789341  |
| H  | -1.4353680 | -1.2672620 | 1.4830471  |
| O  | 3.1624510  | -0.8691670 | 0.9348211  |
| C  | 0.0941340  | 3.1204080  | -0.1098339 |
| H  | -0.5402330 | 3.8413480  | -0.6512279 |
| H  | 0.6549310  | 3.6578020  | 0.6688781  |
| H  | 0.8265310  | 2.6897440  | -0.8094979 |
| C  | -1.2609520 | -3.2839310 | 0.7250201  |
| H  | -0.9806720 | -3.7093110 | 1.6991901  |
| H  | -2.3406340 | -3.4448720 | 0.5749551  |
| H  | -0.7076260 | -3.8304330 | -0.0559079 |
| Ru | 1.3775740  | 0.0514390  | 0.7647531  |
| I  | 4.4118650  | 0.3646870  | 0.1226311  |
| O  | 5.0588870  | 1.6954600  | 1.1291681  |
| O  | 2.5418800  | 1.3199010  | -0.0196149 |
| O  | 5.7247710  | -0.9118060 | 0.1433831  |
| O  | 4.4612670  | 0.5001970  | -1.7033909 |
| Na | 6.0265920  | -1.0923310 | -2.0103799 |

$E = -1181.99187483$

G = -1181.815803

$q_{[\text{ox}]}$

|    |            |            |            |
|----|------------|------------|------------|
| C  | 1.0417263  | -1.1663308 | 0.3412305  |
| H  | 1.5356673  | -1.6466878 | 1.2070525  |
| O  | 0.5026713  | 0.0844402  | 0.7635995  |
| O  | -0.8838337 | -1.2710048 | -1.0111495 |
| O  | -1.3425237 | 1.5581402  | -0.9572445 |
| C  | 2.0268123  | -0.8498828 | -0.7811225 |
| H  | 3.0373523  | -0.7119758 | -0.3619095 |
| H  | 2.0811773  | -1.6588808 | -1.5249975 |
| C  | 1.5033423  | 0.4628502  | -1.3468175 |
| H  | 2.2861583  | 1.0727192  | -1.8220195 |
| H  | 0.6986403  | 0.2898572  | -2.0766135 |
| C  | 0.9459413  | 1.1341342  | -0.1047955 |
| H  | 1.7503873  | 1.6961362  | 0.4170525  |
| O  | -2.5629867 | 0.3353832  | 1.2831565  |
| C  | -0.1966657 | 2.1100762  | -0.3349215 |
| H  | 0.1715993  | 2.8464592  | -1.0813045 |
| C  | -0.1420797 | -2.0364088 | -0.1057675 |
| H  | 0.2489743  | -2.8906658 | -0.6978275 |
| O  | -3.4888067 | -0.5071348 | -1.3752895 |
| C  | -0.5891757 | 2.8333412  | 0.9390355  |
| H  | 0.2642573  | 3.4171512  | 1.3199885  |
| H  | -1.4259657 | 3.5200782  | 0.7468135  |
| H  | -0.8881617 | 2.1175512  | 1.7203555  |
| C  | -0.9401927 | -2.5693818 | 1.0694395  |
| H  | -1.8684537 | -3.0512938 | 0.7234265  |
| H  | -0.3482197 | -3.3193648 | 1.6172045  |
| H  | -1.1981447 | -1.7600998 | 1.7728735  |
| Ru | -2.2194977 | -0.0392058 | -0.3394495 |

$E_{\text{THF}} = -782.850685761$   
 $G_{\text{THF}} = -782.669620$

$q_{[\text{ox}][\text{Na}[\text{O}4]]}$

|   |            |            |            |
|---|------------|------------|------------|
| C | -1.9179640 | -0.8428380 | -0.4872800 |
| H | -2.0576080 | -1.6086960 | -1.2701500 |
| O | -0.9869510 | 0.1147460  | -1.0340810 |
| O | -0.0274200 | -1.9374710 | 0.5611970  |
| O | 0.5692290  | 0.6276940  | 0.8712230  |
| C | -3.1529640 | -0.0062450 | -0.2054190 |
| H | -3.7016000 | 0.1789990  | -1.1425070 |
| H | -3.8451970 | -0.4841380 | 0.5035550  |
| C | -2.5360650 | 1.2812360  | 0.3303820  |
| H | -3.1845740 | 2.1592580  | 0.1982290  |
| H | -2.3203450 | 1.1932080  | 1.4086490  |
| C | -1.2372280 | 1.4091920  | -0.4608300 |
| H | -1.3513910 | 2.1081810  | -1.3088730 |
| O | 1.1552030  | -1.3392240 | -1.9007740 |
| C | 0.0089300  | 1.8046360  | 0.3672450  |
| H | -0.3351640 | 2.3654930  | 1.2623130  |



|    |            |            |            |
|----|------------|------------|------------|
| C  | -1.3386000 | -1.5076100 | 0.7659720  |
| H  | -1.3229060 | -0.7575930 | 1.5889940  |
| O  | 2.6065010  | -1.6062640 | 0.5339030  |
| C  | 0.9556850  | 2.6879970  | -0.4218420 |
| H  | 0.4528340  | 3.6462720  | -0.6350760 |
| H  | 1.8743880  | 2.8856020  | 0.1455000  |
| H  | 1.2440730  | 2.2244960  | -1.3780620 |
| C  | -2.1473230 | -2.7172700 | 1.1958250  |
| H  | -1.6673120 | -3.1894160 | 2.0641830  |
| H  | -3.1770550 | -2.4435280 | 1.4741110  |
| H  | -2.1849610 | -3.4590610 | 0.3817160  |
| Ru | 1.2290980  | -0.7681610 | -0.3209560 |
| I  | 4.3090990  | -0.3994660 | -0.0045860 |
| O  | 4.7707540  | -0.1850550 | 1.7100200  |
| O  | 2.7305970  | 0.5136710  | -0.6676590 |
| O  | 4.9103910  | -1.8891350 | -0.8828720 |
| O  | 5.3928520  | 0.7280850  | -0.9557980 |
| Na | 6.2829930  | -0.7875940 | -2.2862510 |

$E_{\text{THF}} = -1257.17637437$   
 $G_{\text{THF}} = -1256.990454$

**9<sub>[ox][ox]</sub>**

|    |            |            |            |
|----|------------|------------|------------|
| C  | 0.9983878  | -1.4794843 | 0.2194079  |
| H  | 1.3185798  | -2.3170383 | 0.8678959  |
| O  | 1.0539688  | -0.2979593 | 0.9940139  |
| O  | -0.7250412 | -0.5998813 | -0.9724241 |
| O  | -0.6721162 | 1.7933077  | -0.8684491 |
| C  | 1.9534678  | -1.2432873 | -0.9460091 |
| H  | 2.9632958  | -1.5765603 | -0.6595421 |
| H  | 1.6591788  | -1.8042643 | -1.8462701 |
| C  | 1.9191948  | 0.2729687  | -1.1532161 |
| H  | 2.9101258  | 0.6769307  | -1.4078381 |
| H  | 1.2201078  | 0.5504357  | -1.9542191 |
| C  | 1.4231338  | 0.8140737  | 0.1887299  |
| H  | 2.2354968  | 1.3233797  | 0.7439579  |
| O  | -2.9644182 | 1.3114297  | 0.3985799  |
| C  | 0.3138718  | 1.9026997  | 0.1080569  |
| H  | 0.8831638  | 2.7911157  | -0.2574821 |
| C  | -0.4646172 | -1.7411093 | -0.1946931 |
| H  | -0.5242472 | -2.6475533 | -0.8334981 |
| O  | -3.1410492 | -0.8942543 | -1.0550341 |
| C  | -0.2540612 | 2.2037987  | 1.4811099  |
| H  | 0.5631878  | 2.4402637  | 2.1815759  |
| H  | -0.9453342 | 3.0573787  | 1.4417619  |
| H  | -0.7916852 | 1.3328567  | 1.8867109  |
| C  | -1.3369732 | -1.9153373 | 1.0338409  |
| H  | -2.3684302 | -2.1802673 | 0.7697219  |
| H  | -0.9214602 | -2.7166963 | 1.6647769  |
| H  | -1.3390952 | -0.9856573 | 1.6278769  |
| Ru | -2.2669942 | 0.5974407  | -0.9904191 |
| O  | -2.6996372 | 1.3312697  | -2.4689231 |

$E_{\text{THF}} = -857.942746311$

$G_{\text{THF}} = -857.759317$

**9t**

|    |            |            |            |
|----|------------|------------|------------|
| C  | 1.1773964  | 0.8774634  | 0.1424178  |
| H  | 1.5554604  | 1.4905794  | 0.9846138  |
| O  | -0.0057716 | 0.1959874  | 0.5740688  |
| O  | 1.6543434  | -1.0813286 | -1.1618472 |
| O  | -1.6583866 | -1.1222276 | -1.1481892 |
| C  | 0.7661774  | 1.7471574  | -1.0486362 |
| H  | 1.1446994  | 2.7729874  | -0.9297272 |
| H  | 1.2000264  | 1.3395834  | -1.9745682 |
| C  | -0.7655856 | 1.6920904  | -1.0971312 |
| H  | -1.2243076 | 2.6912414  | -1.0694172 |
| H  | -1.1079456 | 1.1949124  | -2.0179592 |
| C  | -1.1871756 | 0.8632044  | 0.1164408  |
| H  | -1.5708796 | 1.5019354  | 0.9370728  |
| O  | 0.0359704  | -3.5177456 | -0.0192532 |
| C  | -2.2071416 | -0.2318996 | -0.1981562 |
| H  | -3.0717566 | 0.2565864  | -0.6950132 |
| C  | 2.2009604  | -0.2072416 | -0.1950912 |
| H  | 3.0642284  | 0.2932194  | -0.6820782 |
| C  | -2.6865186 | -0.9575706 | 1.0426788  |
| H  | -3.2008366 | -0.2664396 | 1.7298818  |
| H  | -3.3843496 | -1.7609076 | 0.7649778  |
| H  | -1.8393206 | -1.4102096 | 1.5853918  |
| C  | 2.6831924  | -0.9559506 | 1.0314458  |
| H  | 3.3751604  | -1.7584056 | 0.7363858  |
| H  | 3.2051804  | -0.2791326 | 1.7270098  |
| H  | 1.8370584  | -1.4134026 | 1.5721298  |
| Ru | 0.0101224  | -1.9544866 | -0.7074472 |

$E_{\text{THF}} = -707.711428183$

$G_{\text{THF}} = -707.532258$

**9t<sub>HO</sub>**

|   |            |            |            |
|---|------------|------------|------------|
| C | -1.2931547 | -1.0791173 | -0.0677248 |
| H | -1.6205057 | -1.8503123 | 0.6568232  |
| O | -0.1032687 | -0.4497283 | 0.4731022  |
| O | -1.7858247 | 1.1086947  | -0.9077678 |
| O | 1.7462293  | 0.8696107  | -0.8627198 |
| C | -0.8424657 | -1.6884473 | -1.3875598 |
| H | -1.3948177 | -2.6137823 | -1.6064218 |
| H | -1.0503207 | -0.9721653 | -2.1984948 |
| C | 0.6669093  | -1.9108883 | -1.2361428 |
| H | 0.9310013  | -2.9779173 | -1.1957088 |
| H | 1.2128453  | -1.4623133 | -2.0800228 |
| C | 1.0644893  | -1.2111433 | 0.0666842  |
| H | 1.2804333  | -1.9329823 | 0.8762302  |
| C | 2.2028273  | -0.1978563 | -0.0721798 |
| H | 2.9977303  | -0.6986353 | -0.6671748 |
| C | -2.3397967 | 0.0232687  | -0.1997698 |
| H | -3.1688127 | -0.3899393 | -0.8135838 |

|    |            |            |            |
|----|------------|------------|------------|
| O  | -0.0345537 | 3.2028527  | -1.3781568 |
| H  | 0.8622453  | 3.5763447  | -1.4256238 |
| O  | 0.7280093  | 2.3831937  | 1.2791232  |
| H  | 0.2719673  | 3.2280147  | 1.4263122  |
| C  | 2.7877853  | 0.2197557  | 1.2637512  |
| H  | 3.2765473  | -0.6423583 | 1.7475582  |
| H  | 3.5409213  | 1.0060717  | 1.1085262  |
| H  | 2.0199283  | 0.6252357  | 1.9371322  |
| C  | -2.8861037 | 0.4690227  | 1.1435672  |
| H  | -3.5904507 | 1.3015117  | 1.0012962  |
| H  | -3.4132457 | -0.3536823 | 1.6535072  |
| H  | -2.0705247 | 0.8153417  | 1.8018792  |
| Ru | 0.0039763  | 1.6023497  | -0.3364398 |

$E_{\text{THF}} = -784.129042214$

$G_{\text{THF}} = -784.928553$

### 9q

|    |            |            |            |
|----|------------|------------|------------|
| C  | 1.1768351  | 0.8052299  | 0.0405110  |
| H  | 1.4620931  | 1.4913389  | 0.8632260  |
| O  | 0.0000171  | 0.0881729  | 0.4461580  |
| O  | 1.8481921  | -1.2094641 | -1.0829960 |
| O  | -1.8496549 | -1.2077821 | -1.0829470 |
| C  | 0.7697951  | 1.5782669  | -1.2156190 |
| H  | 1.1916201  | 2.5939059  | -1.2056470 |
| H  | 1.1679981  | 1.0672879  | -2.1075420 |
| C  | -0.7675649 | 1.5783569  | -1.2163640 |
| H  | -1.1893019 | 2.5940449  | -1.2077950 |
| H  | -1.1649679 | 1.0664779  | -2.1081230 |
| C  | -1.1758749 | 0.8064809  | 0.0399790  |
| H  | -1.4604399 | 1.4933019  | 0.8623430  |
| O  | -0.0031529 | -2.9941151 | 0.4009300  |
| C  | -2.2803139 | -0.2385411 | -0.1649740 |
| H  | -3.1406459 | 0.2965689  | -0.6239860 |
| C  | 2.2800411  | -0.2410371 | -0.1647440 |
| H  | 3.1410081  | 0.2932919  | -0.6234850 |
| C  | -2.7178929 | -0.8716301 | 1.1415310  |
| H  | -3.1140239 | -0.1135761 | 1.8370850  |
| H  | -3.5028989 | -1.6178141 | 0.9521030  |
| H  | -1.8701659 | -1.3836401 | 1.6240980  |
| C  | 2.7168821  | -0.8752361 | 1.1414770  |
| H  | 3.5017731  | -1.6214881 | 0.9518060  |
| H  | 3.1129561  | -0.1178831 | 1.8378180  |
| H  | 1.8687581  | -1.3874201 | 1.6231710  |
| Ru | -0.0010709 | -1.8730991 | -0.9580150 |

$E_{\text{THF}} = -707.676261824$

$G_{\text{THF}} = -707.500097$

### 9q<sub>HO</sub>

|   |            |            |            |
|---|------------|------------|------------|
| C | -1.2561859 | -0.9838074 | -0.0152900 |
| H | -1.5469899 | -1.8418314 | 0.6246450  |
| O | -0.0750419 | -0.3897274 | 0.5389380  |

|    |            |            |            |
|----|------------|------------|------------|
| O  | -1.9194189 | 1.2676486  | -0.5890110 |
| O  | 1.8596781  | 1.1850166  | -0.5867890 |
| C  | -0.8487479 | -1.4421544 | -1.4172580 |
| H  | -1.3198489 | -2.4028694 | -1.6701090 |
| H  | -1.1704289 | -0.6965664 | -2.1618200 |
| C  | 0.6892031  | -1.5250264 | -1.3822680 |
| H  | 1.0632021  | -2.5438164 | -1.5600110 |
| H  | 1.1261161  | -0.8690594 | -2.1512230 |
| C  | 1.0896051  | -1.0369264 | 0.0142750  |
| H  | 1.3418961  | -1.8886884 | 0.6782690  |
| C  | 2.2136611  | 0.0021966  | 0.0900660  |
| H  | 3.0885981  | -0.4324984 | -0.4400730 |
| C  | -2.3398269 | 0.0962356  | 0.0664310  |
| H  | -3.2239089 | -0.2905644 | -0.4841280 |
| O  | -0.0127559 | 1.5361246  | -2.6028910 |
| H  | 0.9040691  | 1.5427396  | -2.9215580 |
| O  | -0.0156879 | 2.6823156  | 1.0366950  |
| H  | 0.8900891  | 2.8988916  | 1.3083070  |
| C  | 2.5918511  | 0.3097516  | 1.5276940  |
| H  | 2.9589471  | -0.5901124 | 2.0476520  |
| H  | 3.3858181  | 1.0707256  | 1.5513280  |
| H  | 1.7172471  | 0.6949476  | 2.0763140  |
| C  | -2.7191059 | 0.4168626  | 1.5003990  |
| H  | -3.5100309 | 1.1798826  | 1.5149530  |
| H  | -3.0856829 | -0.4804344 | 2.0253750  |
| H  | -1.8465129 | 0.8205206  | 2.0374150  |
| Ru | -0.0298059 | 1.7102246  | -0.6563280 |

$E_{\text{THF}} = -784.118722636$   
 $G_{\text{THF}} = -783.917969$

**10**

|    |            |            |            |
|----|------------|------------|------------|
| C  | 2.3912658  | 1.4289498  | 0.0098421  |
| H  | 2.9686898  | 1.0594758  | -0.8458249 |
| O  | 1.0846608  | -0.6338892 | -0.7594309 |
| O  | -0.9932072 | -1.5493242 | 0.3057661  |
| C  | 2.5546538  | 0.7195348  | 1.3194321  |
| H  | 3.5407778  | 0.2231078  | 1.3471161  |
| H  | 2.5495578  | 1.4559438  | 2.1422911  |
| C  | 1.4689148  | -0.3221212 | 1.5963711  |
| H  | 1.6931758  | -0.8687152 | 2.5297741  |
| H  | 0.4925638  | 0.1750248  | 1.7450791  |
| C  | 1.3425868  | -1.3128832 | 0.4523781  |
| H  | 2.2997248  | -1.8582282 | 0.3094931  |
| C  | 1.6154358  | 2.5229698  | -0.1716079 |
| H  | 1.0842278  | 2.9306298  | 0.6995371  |
| C  | 0.1811278  | -2.2848932 | 0.6108121  |
| H  | 0.0752808  | -2.5914262 | 1.6715071  |
| Ru | -0.7806842 | -0.1783232 | -1.0459929 |
| O  | -0.5806722 | 1.4641148  | -0.5814119 |
| O  | -2.7075662 | -0.1467382 | -0.7755599 |
| C  | 0.3000708  | -3.4980262 | -0.2843299 |
| H  | 1.1538478  | -4.1281332 | 0.0130841  |

|    |            |            |            |
|----|------------|------------|------------|
| H  | -0.6176982 | -4.1007802 | -0.2272029 |
| H  | 0.4447618  | -3.1864802 | -1.3323399 |
| C  | 1.5326698  | 3.2939668  | -1.4395019 |
| H  | 2.0569178  | 4.2616178  | -1.3469349 |
| H  | 1.9857578  | 2.7380718  | -2.2751419 |
| H  | 0.4868528  | 3.5213708  | -1.6993039 |
| I  | -4.7241302 | -0.1135722 | -0.4924779 |
| O  | -4.6006072 | 0.1848488  | 1.3124171  |
| O  | -5.9464882 | 1.2603978  | -0.7655499 |
| O  | -5.5381822 | -1.7070542 | -0.7107159 |
| O  | -0.7635612 | -0.6167192 | -2.6976439 |
| Na | -6.0507272 | 1.8572808  | 1.3860711  |

$E_{\text{THF}} = -1181.89231658$   
 $G_{\text{THF}} = -1181.722406$

**11**

|    |            |            |            |
|----|------------|------------|------------|
| C  | -1.0545939 | 0.5004386  | -1.2002462 |
| O  | -0.0059239 | -0.3895174 | -1.5243872 |
| C  | -0.2087019 | -1.6280034 | -0.8833252 |
| C  | -1.7241879 | -1.7902414 | -0.8842902 |
| C  | -2.2120669 | -0.3573964 | -0.6628242 |
| C  | 0.4480921  | -1.6416944 | 0.5366768  |
| C  | 1.6327261  | -2.5875264 | 0.6017748  |
| O  | 0.7257971  | 1.9115786  | -0.2567222 |
| C  | -0.6181699 | 1.5925196  | -0.1908862 |
| C  | -1.4078089 | 2.8715786  | -0.4367082 |
| O  | 0.6972121  | -0.3471184 | 0.9949128  |
| O  | 3.2287831  | -0.1579314 | 1.3984998  |
| O  | 3.1064891  | 2.2874976  | 0.2955198  |
| H  | -1.3191199 | 1.0138496  | -2.1440572 |
| H  | 0.2887441  | -2.3910884 | -1.5071332 |
| H  | -2.0465319 | -2.1581274 | -1.8715342 |
| H  | -2.0907779 | -2.5000414 | -0.1262322 |
| H  | -3.1652839 | -0.1542054 | -1.1729392 |
| H  | -2.3705239 | -0.1584284 | 0.4122618  |
| H  | -0.3169059 | -2.0161824 | 1.2572968  |
| H  | 2.0957211  | -2.5795614 | 1.5987608  |
| H  | 1.3032871  | -3.6145764 | 0.3729108  |
| H  | 2.3986061  | -2.3084414 | -0.1435762 |
| H  | -0.8635649 | 1.2288976  | 0.8286418  |
| H  | -2.4889929 | 2.6514236  | -0.4231742 |
| H  | -1.1936259 | 3.6251866  | 0.3352668  |
| H  | -1.1478779 | 3.2976536  | -1.4183952 |
| O  | 2.6646461  | 0.0259486  | -1.1976722 |
| O  | 1.5048551  | 1.6582986  | 2.4326948  |
| H  | 0.9696121  | 2.4190776  | 2.1625928  |
| H  | 0.8701881  | 0.9252076  | 2.5291068  |
| Ru | 2.2999001  | 0.7709266  | 0.2871868  |

$E_{\text{THF}} = -934.357711761$   
 $G_{\text{THF}} = -934.150660$

**12**

|    |            |            |            |
|----|------------|------------|------------|
| C  | -1.0984417 | 0.8673574  | -0.9060064 |
| O  | -0.3687477 | -0.2192036 | -1.4479474 |
| C  | -0.6881477 | -1.3922656 | -0.7492574 |
| C  | -2.1798847 | -1.2507626 | -0.4745884 |
| C  | -2.3224887 | 0.2521534  | -0.2027924 |
| C  | 0.1497203  | -1.5923226 | 0.5690076  |
| C  | 0.6869223  | -3.0056866 | 0.6498966  |
| O  | 1.0764733  | 1.8198424  | -0.4337644 |
| C  | -0.2261297 | 1.6950674  | 0.0454816  |
| C  | -0.8197407 | 3.0889444  | 0.2123846  |
| O  | 1.1368093  | -0.6321136 | 0.8081576  |
| O  | 3.8812103  | -0.8191996 | 0.3580236  |
| O  | 3.3412543  | 1.2056014  | -1.3488334 |
| H  | -1.3718827 | 1.5069524  | -1.7650784 |
| H  | -0.4558817 | -2.2307526 | -1.4265514 |
| H  | -2.7395677 | -1.5347916 | -1.3796614 |
| H  | -2.5351017 | -1.8842016 | 0.3537126  |
| H  | -3.2734167 | 0.6534314  | -0.5825364 |
| H  | -2.2933547 | 0.4648254  | 0.8805966  |
| H  | -0.5535997 | -1.4258686 | 1.4171856  |
| H  | 1.1926783  | -3.1783696 | 1.6112136  |
| H  | -0.1362947 | -3.7341226 | 0.5518026  |
| H  | 1.4051083  | -3.1921636 | -0.1660784 |
| H  | -0.2161067 | 1.1971214  | 1.0408906  |
| H  | -1.8653857 | 3.0254644  | 0.5584066  |
| H  | -0.2466267 | 3.6748124  | 0.9457656  |
| H  | -0.7956167 | 3.6227684  | -0.7507244 |
| O  | 2.0363383  | -1.1726116 | -1.6035624 |
| O  | 2.6613623  | 1.4014484  | 1.2138836  |
| H  | 1.8203603  | 1.8903954  | 0.5346866  |
| H  | 2.2076223  | 0.9400674  | 1.9373456  |
| Ru | 2.5905563  | -0.0418166 | -0.4510584 |

$E_{\text{THF}} = -934.339413340$   
 $G_{\text{THF}} = -934.134750$

**13**

|   |            |            |            |
|---|------------|------------|------------|
| C | 1.4925392  | -0.5306814 | -0.7426056 |
| O | 0.0694822  | -0.5435494 | -0.7878286 |
| C | -0.4547488 | 0.7662016  | -0.7445236 |
| C | 0.7336672  | 1.6946346  | -0.9797546 |
| C | 1.8800262  | 0.8947376  | -0.3786386 |
| C | -1.1575618 | 0.9889156  | 0.6022754  |
| C | -1.7914778 | 2.3664426  | 0.7298654  |
| O | 1.5781452  | -2.8274454 | -0.3137836 |
| C | 1.9754732  | -1.5884614 | 0.2268214  |
| C | 3.4799912  | -1.5360804 | 0.4154554  |
| O | -2.0308078 | -0.0516374 | 0.9370174  |
| H | 1.8820302  | -0.8020894 | -1.7477506 |
| H | -1.2184668 | 0.8676226  | -1.5431286 |
| H | 0.8884512  | 1.8221386  | -2.0635486 |

|    |            |            |            |
|----|------------|------------|------------|
| H  | 0.6115912  | 2.6963076  | -0.5427636 |
| H  | 2.8685212  | 1.1830516  | -0.7658746 |
| H  | 1.9037812  | 1.0134146  | 0.7211854  |
| H  | -0.3683528 | 0.8833056  | 1.3842414  |
| H  | -2.4925298 | 2.3743196  | 1.5770234  |
| H  | -1.0215258 | 3.1308586  | 0.9185584  |
| H  | -2.3466798 | 2.6542336  | -0.1760736 |
| H  | 1.4602842  | -1.3921644 | 1.1955194  |
| H  | 3.8147542  | -2.3690754 | 1.0551624  |
| H  | 3.9873662  | -1.6390224 | -0.5588046 |
| H  | 3.8141252  | -0.6010674 | 0.8925604  |
| H  | 1.8143162  | -3.5182024 | 0.3158374  |
| O  | -3.6080518 | -1.7156174 | 1.3974574  |
| H  | -2.8169858 | -1.3866554 | 1.8762664  |
| O  | -3.7999818 | 0.8786036  | -0.7123006 |
| O  | -5.0838578 | -1.4675234 | -0.4713836 |
| O  | -2.5364188 | -1.4884344 | -1.4417336 |
| Ru | -3.5270978 | -0.7570804 | -0.2747506 |

$E_{\text{THF}} = -934.364129903$

$G_{\text{THF}} = -934.160979$

#### 14

|   |            |            |            |
|---|------------|------------|------------|
| C | 1.3424534  | -0.7462724 | -0.9227120 |
| O | -0.0103756 | -0.3244884 | -1.1356700 |
| C | -0.1697416 | 1.0178026  | -0.7841120 |
| C | 1.1957744  | 1.6497086  | -1.0053460 |
| C | 2.1376514  | 0.5184626  | -0.5978070 |
| C | -0.6709376 | 1.1986226  | 0.6918090  |
| C | -1.3024726 | 2.5637126  | 0.8790590  |
| O | 0.4710314  | -2.8456984 | -0.1446220 |
| C | 1.3572294  | -1.8098704 | 0.1700950  |
| C | 2.7308954  | -2.4207444 | 0.3220020  |
| O | -1.4979386 | 0.1650436  | 1.0725910  |
| H | 1.6717104  | -1.2263334 | -1.8646840 |
| H | -0.9715846 | 1.4264106  | -1.4301660 |
| H | 1.3137714  | 1.8927806  | -2.0735930 |
| H | 1.3482254  | 2.5758276  | -0.4298930 |
| H | 3.1035324  | 0.5552276  | -1.1217340 |
| H | 2.3538844  | 0.5633046  | 0.4848470  |
| H | 0.2484404  | 1.1132026  | 1.3195100  |
| H | -1.5752256 | 2.7204406  | 1.9345130  |
| H | -0.6189616 | 3.3755426  | 0.5827600  |
| H | -2.2183646 | 2.6528606  | 0.2703270  |
| H | 1.0600184  | -1.3075214 | 1.1204050  |
| H | 2.7037454  | -3.2109284 | 1.0861620  |
| H | 3.0403634  | -2.8844364 | -0.6296280 |
| H | 3.4879014  | -1.6770794 | 0.6166480  |
| H | -0.4085266 | -2.4498364 | -0.2597840 |
| O | -3.6490426 | -0.1279214 | 1.7220090  |
| H | -2.5949596 | 0.2094816  | 1.8278450  |
| O | -3.1562026 | 0.6371746  | -1.1421860 |

|    |            |            |            |
|----|------------|------------|------------|
| O  | -4.9822456 | -1.2000984 | -0.2282240 |
| O  | -2.3649246 | -1.9737264 | -0.3063340 |
| Ru | -3.3751246 | -0.6306504 | -0.0240880 |

$E_{\text{THF}} = -934.357957979$   
 $G_{\text{THF}} = -934.157902$

### 15

|   |            |            |            |
|---|------------|------------|------------|
| C | 1.1228850  | -0.1223908 | 0.3736633  |
| H | 1.2661070  | -0.2328778 | 1.4740753  |
| O | -0.0000070 | -0.8739228 | -0.0300417 |
| C | 0.7676800  | 1.3284922  | 0.0302443  |
| H | 1.2018440  | 2.0436982  | 0.7457233  |
| H | 1.1574680  | 1.5854382  | -0.9697927 |
| C | -0.7676620 | 1.3284722  | 0.0300663  |
| H | -1.2020160 | 2.0438032  | 0.7453023  |
| H | -1.1572000 | 1.5852012  | -0.9701247 |
| C | -1.1228940 | -0.1223578 | 0.3736213  |
| H | -1.2660960 | -0.2327418 | 1.4740483  |
| C | 2.3613620  | -0.6566058 | -0.3051337 |
| H | 2.1473920  | -0.6634198 | -1.3980917 |
| C | -2.3613790 | -0.6566358 | -0.3051087 |
| H | -2.1474030 | -0.6636028 | -1.3980637 |
| C | -3.5756800 | 0.2065322  | -0.0175307 |
| H | -3.7427940 | 0.2707062  | 1.0711513  |
| H | -3.4741740 | 1.2264312  | -0.4211547 |
| H | -4.4781380 | -0.2382818 | -0.4686117 |
| C | 3.5756690  | 0.2065092  | -0.0174307 |
| H | 3.4741630  | 1.2264692  | -0.4208987 |
| H | 3.7427890  | 0.2705192  | 1.0712593  |
| H | 4.4781250  | -0.2382378 | -0.4685847 |
| O | -2.5520990 | -1.9676248 | 0.1793073  |
| H | -3.3129570 | -2.3429748 | -0.2784017 |
| O | 2.5520580  | -1.9676628 | 0.1791053  |
| H | 3.3129570  | -2.3429358 | -0.2785987 |

$E_{\text{THF}} = -539.875078467$   
 $G_{\text{THF}} = -539.677105$

### 16

|   |            |            |            |
|---|------------|------------|------------|
| C | -2.1608036 | -0.5959708 | -1.0045083 |
| H | -2.3894156 | -1.0000098 | -2.0071323 |
| O | -1.5650906 | 0.6760212  | -1.2108623 |
| O | 0.0745524  | -1.5690838 | -0.8225713 |
| O | 0.1216634  | 0.5819142  | 0.8262627  |
| C | -3.4033616 | -0.2931188 | -0.1772783 |
| H | -4.2073786 | 0.0719622  | -0.8364573 |
| H | -3.7879806 | -1.1653348 | 0.3728197  |
| C | -2.9024886 | 0.8195372  | 0.7392587  |
| H | -3.7030036 | 1.4991672  | 1.0664457  |
| H | -2.4362376 | 0.3986002  | 1.6458877  |
| C | -1.8478436 | 1.5354672  | -0.1074063 |



|    |            |            |            |
|----|------------|------------|------------|
| H  | -2.2384486 | 2.4858092  | -0.5215053 |
| O  | 1.2023194  | 0.6596742  | -2.1123253 |
| C  | -0.5341936 | 1.8093882  | 0.6409767  |
| H  | -0.7856256 | 2.1437412  | 1.6725917  |
| C  | -1.2190546 | -1.5889128 | -0.2951993 |
| H  | -1.1602606 | -1.3113538 | 0.7777047  |
| O  | 2.7406404  | -1.2993778 | -0.8090913 |
| C  | 0.2923874  | 2.9057022  | -0.0083043 |
| H  | -0.2197696 | 3.8738562  | 0.1110597  |
| H  | 1.2885074  | 2.9674262  | 0.4543387  |
| H  | 0.4175504  | 2.7231272  | -1.0886593 |
| C  | -1.7105536 | -3.0189078 | -0.4277463 |
| H  | -1.0338796 | -3.6962208 | 0.1115977  |
| H  | -2.7253876 | -3.1382948 | -0.0163203 |
| H  | -1.7245946 | -3.3181898 | -1.4883073 |
| Ru | 1.3071704  | -0.1074188 | -0.6332813 |
| I  | 4.3220544  | -0.2719408 | 0.0710237  |
| O  | 4.3832594  | -1.2403478 | 1.5848547  |
| O  | 2.7181744  | 0.9070952  | 0.2166967  |
| O  | 5.3651734  | -0.9284538 | -1.2858173 |
| O  | 5.3839334  | 1.2058122  | 0.2818997  |
| Na | 6.8223074  | 0.7645462  | -1.3603243 |
| O  | 1.5312744  | -1.3525068 | 1.6337567  |
| H  | 2.4631274  | -1.5619928 | 1.8404397  |
| H  | 1.3212764  | -0.5714128 | 2.1654837  |

$E_{\text{THF}} = -1333.58906876$   
 $G_{\text{THF}} = -1333.377765$

## 17

|   |            |            |            |
|---|------------|------------|------------|
| C | -2.1441749 | -0.4956002 | -0.9192057 |
| H | -2.5139139 | -0.6934822 | -1.9416847 |
| O | -1.6431239 | 0.8247808  | -0.9004157 |
| O | 0.1697071  | -1.1953592 | -1.1902817 |
| O | 0.3702301  | 1.0887208  | 1.0308483  |
| C | -3.2390269 | -0.5241022 | 0.1405203  |
| H | -4.1747359 | -0.1095802 | -0.2694287 |
| H | -3.4513939 | -1.5367052 | 0.5167963  |
| C | -2.6533949 | 0.4100448  | 1.1925053  |
| H | -3.4093529 | 0.8543428  | 1.8566323  |
| H | -1.9227489 | -0.1196212 | 1.8291843  |
| C | -1.9471409 | 1.4565588  | 0.3402593  |
| H | -2.6348369 | 2.3046218  | 0.1362323  |
| O | 1.5087061  | 1.3175308  | -1.4639717 |
| C | -0.6668559 | 2.0308478  | 0.9402903  |
| H | -0.9123429 | 2.3223978  | 1.9868493  |
| C | -1.0478999 | -1.5315022 | -0.5967117 |
| H | -0.9167019 | -1.5734542 | 0.5025733  |
| O | 2.6840951  | -1.3025652 | -1.1650077 |
| C | -0.2011759 | 3.2606018  | 0.1887343  |
| H | 0.7746681  | 3.5929168  | 0.5726973  |
| H | -0.0949409 | 3.0378398  | -0.8845017 |
| H | -0.9266839 | 4.0823818  | 0.3011653  |

|    |            |            |            |
|----|------------|------------|------------|
| C  | -1.4241719 | -2.9111072 | -1.1022877 |
| H  | -0.6742749 | -3.6506852 | -0.7890447 |
| H  | -2.4087139 | -3.2228522 | -0.7172447 |
| H  | -1.4655909 | -2.9057132 | -2.2033477 |
| Ru | 1.5256441  | -0.0313952 | -0.4755797 |
| I  | 4.5144591  | -0.8407442 | -0.2231907 |
| O  | 4.6480971  | -2.4301152 | 0.5838813  |
| O  | 3.1220371  | 0.3061258  | 0.5917663  |
| O  | 5.1980221  | -0.6660382 | -1.9127047 |
| O  | 5.7978311  | 0.2407488  | 0.5089293  |
| Na | 6.8606911  | 0.7590608  | -1.3460427 |
| O  | 1.0038421  | -1.0563642 | 1.3847893  |
| H  | 1.7994241  | -1.0828512 | 1.9399893  |
| H  | 0.4957431  | -0.0096822 | 1.5560073  |

$E_{\text{THF}} = -1333.56600606$   
 $G_{\text{THF}} = -1333.360692$

## 18

|    |            |            |            |
|----|------------|------------|------------|
| C  | 1.4688711  | -1.0625553 | 0.9841999  |
| H  | 1.2368771  | -1.4680323 | 1.9867659  |
| O  | 1.3600681  | 0.3514337  | 1.0273939  |
| O  | -0.8143169 | -1.1615713 | 0.5726619  |
| O  | 1.3041131  | 1.7602057  | -1.4113321 |
| C  | 2.9017621  | -1.3644393 | 0.5468089  |
| H  | 3.5457311  | -1.4485733 | 1.4381999  |
| H  | 2.9958001  | -2.3040563 | -0.0167931 |
| C  | 3.2662821  | -0.1248803 | -0.2549671 |
| H  | 4.3504251  | 0.0530187  | -0.3153281 |
| H  | 2.8651701  | -0.1745503 | -1.2811031 |
| C  | 2.5382671  | 0.9670567  | 0.5072769  |
| H  | 3.1625081  | 1.3266127  | 1.3549479  |
| O  | -1.4922389 | 1.5365577  | -0.1426471 |
| C  | 2.1275921  | 2.1644977  | -0.3396651 |
| H  | 3.0518981  | 2.5611147  | -0.8033461 |
| C  | 0.4047671  | -1.6032613 | 0.0139919  |
| H  | 0.5886601  | -1.1365883 | -0.9733661 |
| O  | -3.2574639 | -0.5583203 | 0.9734309  |
| C  | 1.4652211  | 3.2469867  | 0.4887839  |
| H  | 2.1343021  | 3.6138277  | 1.2837619  |
| H  | 1.1794071  | 4.0964057  | -0.1495341 |
| H  | 0.5553771  | 2.8483937  | 0.9687509  |
| C  | 0.3676401  | -3.1111673 | -0.0890471 |
| H  | -0.4728159 | -3.4139893 | -0.7306431 |
| H  | 1.2921421  | -3.5166003 | -0.5275291 |
| H  | 0.2201931  | -3.5590873 | 0.9075829  |
| Ru | -2.0507879 | -0.0349833 | -0.3370091 |
| I  | -5.1272949 | -0.2272253 | 0.0839439  |
| O  | -5.6832779 | -1.9201983 | 0.2001559  |
| O  | -3.6970339 | 0.0523607  | -1.3138191 |
| O  | -5.4976329 | 0.8734877  | 1.4971959  |
| O  | -6.2795099 | 0.6577097  | -1.0290441 |
| Na | -6.9470769 | 2.2137437  | 0.3972669  |

O -1.4211659 -0.9288633 -1.9011451  
H -2.0837729 -0.7598213 -2.5967571  
H 0.4413121 1.5553507 -1.0200441  
E<sub>THF</sub> = -1333.59647156  
G<sub>THF</sub> = -1333.388638

**19**

C -1.9191169 -0.3856596 -0.6999020  
H -2.1129039 -0.6187246 -1.7685820  
O -0.7312559 0.3830354 -0.5982170  
O -0.4794469 -2.2589406 -0.4996680  
O 0.4458801 1.9426914 1.5686080  
C -3.0487329 0.4616664 -0.0879220  
H -3.7309259 0.8215594 -0.8744130  
H -3.6588549 -0.1048966 0.6345920  
C -2.3023159 1.6195944 0.5641920  
H -2.8950489 2.5458514 0.6071170  
H -1.9692239 1.3697744 1.5852200  
C -1.0784719 1.7341784 -0.3193790  
H -1.3341559 2.2601434 -1.2678080  
O 0.6804731 -0.9250966 1.5911390  
C 0.1159311 2.4460144 0.2965020  
H -0.2103579 3.4914044 0.4651420  
C -1.7045909 -1.7080986 0.0138820  
H -1.5688319 -1.4959136 1.0938260  
O 2.3577281 -1.0154496 -0.8434370  
C 1.3066661 2.4331114 -0.6380050  
H 1.0560991 2.8486424 -1.6282280  
H 2.1310951 3.0303924 -0.2168390  
H 1.6738841 1.4068854 -0.7984160  
C -2.8303749 -2.6875676 -0.2068660  
H -2.6131419 -3.6481976 0.2899010  
H -3.7768969 -2.3143906 0.2100340  
H -2.9766749 -2.8751776 -1.2842570  
Ru 1.6234031 -1.9213856 0.5587660  
I 4.3905621 -0.6433316 -0.1772580  
O 5.3517721 -1.7936836 -1.1582080  
O 3.2874301 -1.7056026 1.3118350  
O 4.2285981 1.0026444 -0.9669200  
O 5.4027051 -0.0023156 1.2078480  
Na 5.2386941 2.1585284 0.6974110  
O 1.5867191 -3.6183766 0.3569010  
H 0.6112121 0.9865964 1.4772080  
H -0.5475309 -3.2199066 -0.4958000  
E<sub>THF</sub> = -1333.58821346  
G<sub>THF</sub> = -1333.378663

**20**

C -2.1187231 1.1541752 -0.4884828

|    |            |            |            |
|----|------------|------------|------------|
| O  | -1.2142111 | 0.1233622  | -0.9500598 |
| C  | -1.8365811 | -1.1600718 | -0.8401718 |
| C  | -3.2969841 | -0.8610348 | -1.1242648 |
| C  | -3.5018091 | 0.5005012  | -0.4505188 |
| C  | -1.5614431 | -1.7687098 | 0.5606912  |
| C  | -1.2331521 | -3.2441898 | 0.4324502  |
| O  | -0.1995351 | 1.6988652  | 0.8666362  |
| C  | -1.6097911 | 1.6544222  | 0.8582852  |
| C  | -2.1320701 | 3.0367132  | 1.1774392  |
| O  | -0.5625561 | -1.0863928 | 1.2438132  |
| O  | 2.0666229  | -0.3537868 | 1.2905312  |
| O  | 1.5993669  | 0.4688582  | -1.1573978 |
| H  | -2.0435981 | 1.9662702  | -1.2336258 |
| H  | -1.3597241 | -1.7830958 | -1.6166808 |
| H  | -3.4584211 | -0.7847478 | -2.2109348 |
| H  | -3.9695091 | -1.6416558 | -0.7353838 |
| H  | -4.2644561 | 1.1061012  | -0.9605138 |
| H  | -3.8290731 | 0.3771872  | 0.5965952  |
| H  | -2.4911061 | -1.6632748 | 1.1677182  |
| H  | -1.1091611 | -3.7009218 | 1.4246672  |
| H  | -2.0257381 | -3.7880368 | -0.1107588 |
| H  | -0.2854571 | -3.3603358 | -0.1218178 |
| H  | -1.9321351 | 0.9323782  | 1.6403712  |
| H  | -1.7667261 | 3.3668152  | 2.1599992  |
| H  | -1.7882301 | 3.7586422  | 0.4190552  |
| H  | -3.2349761 | 3.0414402  | 1.1956682  |
| C  | 3.8014239  | 0.5053432  | -0.8357958 |
| H  | 3.8142469  | -0.0447838 | -1.7832438 |
| C  | 4.0100759  | -0.2025388 | 0.3234192  |
| H  | 4.2775509  | 0.3606582  | 1.2243892  |
| C  | 4.2220689  | -1.6749868 | 0.3424332  |
| H  | 3.8042649  | -2.1257738 | 1.2555042  |
| H  | 3.7405139  | -2.1509898 | -0.5276438 |
| H  | 5.2986419  | -1.9218558 | 0.3155702  |
| C  | 3.8566689  | 1.9912232  | -0.8962338 |
| H  | 4.8637359  | 2.3386442  | -1.1903008 |
| H  | 3.1456569  | 2.3917992  | -1.6348758 |
| H  | 3.6177689  | 2.4328842  | 0.0850772  |
| Ru | 0.7065579  | 0.1108982  | 0.2883922  |

$E_{\text{THF}} = -939.945160867$

$G_{\text{THF}} = -939.663917$

## 21

|   |            |            |            |
|---|------------|------------|------------|
| C | -1.8638291 | 1.3578975  | -0.3718545 |
| O | -1.0036851 | 0.3233826  | -0.9068945 |
| C | -1.6783651 | -0.9463725 | -0.9622615 |
| C | -3.1303591 | -0.5576604 | -1.1802955 |
| C | -3.2776711 | 0.7726755  | -0.4269585 |
| C | -1.3863521 | -1.7304945 | 0.3156965  |
| C | -1.5558961 | -3.2187255 | 0.1100215  |
| O | -0.0061361 | 1.5981666  | 1.2372905  |

|    |            |            |            |
|----|------------|------------|------------|
| C  | -1.3997931 | 1.7417296  | 1.0410075  |
| C  | -1.8038041 | 3.1612786  | 1.3703225  |
| O  | -0.0632661 | -1.4951915 | 0.7879675  |
| O  | 2.4485089  | 0.1998156  | 1.3569435  |
| O  | 1.8872569  | 0.1033256  | -1.2049695 |
| H  | -1.7273241 | 2.2197186  | -1.0487365 |
| H  | -1.2297861 | -1.4750485 | -1.8216615 |
| H  | -3.3153111 | -0.4166844 | -2.2560335 |
| H  | -3.8309811 | -1.3269875 | -0.8202305 |
| H  | -3.9875601 | 1.4472336  | -0.9264605 |
| H  | -3.6547701 | 0.6067885  | 0.5966705  |
| H  | -2.0872291 | -1.3898875 | 1.1099745  |
| H  | -1.3422071 | -3.7556005 | 1.0448855  |
| H  | -2.5813781 | -3.4682294 | -0.2083605 |
| H  | -0.8505191 | -3.5734454 | -0.6590785 |
| H  | -1.8990381 | 1.0509685  | 1.7575955  |
| H  | -1.5052881 | 3.4107145  | 2.3980525  |
| H  | -1.3025701 | 3.8634706  | 0.6846115  |
| H  | -2.8951131 | 3.2940566  | 1.2791945  |
| C  | 3.2886439  | 0.1636656  | -0.8661115 |
| H  | 3.7919109  | -0.5042795 | -1.5948395 |
| C  | 3.4661499  | -0.3599514 | 0.5579655  |
| H  | 4.4328379  | 0.0179006  | 0.9555235  |
| C  | 3.4676369  | -1.8783505 | 0.6314905  |
| H  | 3.5033059  | -2.1998865 | 1.6831675  |
| H  | 2.5510199  | -2.2996545 | 0.1838795  |
| H  | 4.3354519  | -2.3057975 | 0.1012775  |
| C  | 3.7682489  | 1.5872776  | -1.0381615 |
| H  | 4.8639359  | 1.6488825  | -0.9368455 |
| H  | 3.4850369  | 1.9763985  | -2.0276755 |
| H  | 3.3128059  | 2.2260335  | -0.2625305 |
| Ru | 0.7754809  | 0.1308666  | 0.3164225  |

$E_{\text{THF}} = -940.057106772$   
 $G_{\text{THF}} = -939.768939$

## 21<sub>Na</sub>IO4

|   |            |            |            |
|---|------------|------------|------------|
| C | -1.3391455 | -1.5258185 | 1.1307170  |
| O | -1.6762775 | -0.2488025 | 0.5149780  |
| C | -2.7870615 | -0.3440575 | -0.4053480 |
| C | -3.4640965 | -1.6499605 | -0.0251110 |
| C | -2.3310665 | -2.5168615 | 0.5325590  |
| C | -2.2001045 | -0.2447165 | -1.8108120 |
| C | -3.2356285 | 0.1453675  | -2.8425400 |
| O | 0.9190615  | -0.6792465 | 0.8515260  |
| C | 0.1258695  | -1.8557295 | 0.8282900  |
| C | 0.6986895  | -2.8486325 | 1.8132180  |
| O | -1.1678525 | 0.7094615  | -1.8385410 |
| O | 1.8096715  | 1.4534515  | -0.7216210 |
| O | 0.0083605  | 1.9003245  | 1.1215310  |
| H | -1.4799475 | -1.3755125 | 2.2163410  |
| H | -3.4166685 | 0.5424585  | -0.2112990 |
| H | -4.2279045 | -1.4648875 | 0.7462590  |

|    |            |            |            |
|----|------------|------------|------------|
| H  | -3.9676495 | -2.1217345 | -0.8835400 |
| H  | -2.6907095 | -3.2463195 | 1.2726610  |
| H  | -1.8400155 | -3.0823035 | -0.2780320 |
| H  | -1.7615115 | -1.2354445 | -2.0813480 |
| H  | -2.7635885 | 0.2215435  | -3.8319660 |
| H  | -4.0484015 | -0.5964955 | -2.9005780 |
| H  | -3.6673985 | 1.1275585  | -2.5902280 |
| H  | 0.1627045  | -2.2863245 | -0.1936300 |
| H  | 1.7182945  | -3.1195105 | 1.4998780  |
| H  | 0.7278125  | -2.4113845 | 2.8241070  |
| H  | 0.0837045  | -3.7641385 | 1.8368160  |
| C  | 1.1923445  | 2.6793775  | 1.2667030  |
| H  | 0.8692655  | 3.7200455  | 1.4801610  |
| C  | 2.0037945  | 2.6929085  | -0.0386030 |
| H  | 3.0831525  | 2.7642615  | 0.1969870  |
| C  | 1.5849825  | 3.8035125  | -0.9786210 |
| H  | 2.1080055  | 3.7127325  | -1.9416420 |
| H  | 0.4986705  | 3.7495655  | -1.1688220 |
| H  | 1.8101125  | 4.7904685  | -0.5423460 |
| C  | 1.9812075  | 2.1270355  | 2.4379970  |
| H  | 2.8077115  | 2.8085875  | 2.7009590  |
| H  | 1.3258085  | 2.0140035  | 3.3142220  |
| H  | 2.4121425  | 1.1467065  | 2.1756510  |
| Ru | 0.0440755  | 0.6681735  | -0.3392470 |
| I  | 2.7809765  | -0.7272745 | -0.8339750 |
| O  | 3.8094545  | -0.1171645 | 0.5698370  |
| O  | 3.0729265  | -2.5057605 | -0.5539440 |
| O  | 1.0622905  | -0.7007695 | -1.6398590 |
| O  | 3.9724425  | -0.4396805 | -2.1711930 |
| Na | 5.3914955  | -1.6690125 | -0.5085540 |

$E_{\text{THF}} = -1414.33539591$   
 $G_{\text{THF}} = -1414.042063$

### 21<sub>[ox]</sub>

|   |            |            |            |
|---|------------|------------|------------|
| C | -1.9120641 | 1.1166586  | -0.8275680 |
| O | -1.3721781 | -0.1333724 | -1.2669690 |
| C | -2.1479621 | -1.1849764 | -0.6731210 |
| C | -3.5672251 | -0.6547904 | -0.7714200 |
| C | -3.3922181 | 0.8530896  | -0.5288990 |
| C | -1.7072771 | -1.4650274 | 0.7768200  |
| C | -1.9762601 | -2.9210934 | 1.1164860  |
| O | 0.2383529  | 1.3062046  | 0.1220550  |
| C | -1.0922741 | 1.5910196  | 0.3816520  |
| C | -1.2421931 | 3.0847066  | 0.5910100  |
| O | -0.3447201 | -1.2322324 | 1.0227940  |
| O | 2.2702929  | -0.8880354 | 0.8500340  |
| O | 2.2084859  | 0.6204266  | -1.1846320 |
| H | -1.7453721 | 1.8243636  | -1.6571820 |
| H | -1.9586481 | -2.0748804 | -1.2955020 |
| H | -3.9663761 | -0.8427604 | -1.7797120 |
| H | -4.2460781 | -1.1310714 | -0.0467820 |
| H | -4.0552281 | 1.4481456  | -1.1729470 |

|    |            |            |            |
|----|------------|------------|------------|
| H  | -3.6263691 | 1.1257816  | 0.5144240  |
| H  | -2.3096561 | -0.8229474 | 1.4577480  |
| H  | -1.7291011 | -3.1225464 | 2.1679910  |
| H  | -3.0352431 | -3.1811174 | 0.9460140  |
| H  | -1.3470961 | -3.5666454 | 0.4808180  |
| H  | -1.4427081 | 1.0553036  | 1.2890740  |
| H  | -0.6618731 | 3.4103816  | 1.4659130  |
| H  | -0.8696721 | 3.6271766  | -0.2925410 |
| H  | -2.2993681 | 3.3528066  | 0.7558970  |
| O  | 0.7348399  | -1.7857494 | -1.4404840 |
| C  | 3.4220629  | 0.6947866  | -0.4701430 |
| H  | 4.2309219  | 0.7644556  | -1.2290260 |
| C  | 3.5663479  | -0.6034764 | 0.3103500  |
| H  | 4.2206469  | -0.4692744 | 1.1939280  |
| C  | 4.0521529  | -1.7607414 | -0.5335620 |
| H  | 3.9819669  | -2.7051584 | 0.0259610  |
| H  | 3.4492429  | -1.8513964 | -1.4519170 |
| H  | 5.1029039  | -1.6042314 | -0.8261750 |
| C  | 3.4314649  | 1.9265256  | 0.4144340  |
| H  | 4.4231449  | 2.0752736  | 0.8721140  |
| H  | 3.1715149  | 2.8167556  | -0.1764730 |
| H  | 2.6812369  | 1.8181176  | 1.2136330  |
| Ru | 0.8615829  | -0.5104544 | -0.3440930 |

$E_{\text{THF}} = -1015.21161683$   
 $G_{\text{THF}} = -1014.919096$

## 22

|   |            |            |            |
|---|------------|------------|------------|
| C | -1.7515109 | -0.8720835 | -0.1448789 |
| H | -1.7213839 | -1.8779885 | -0.6143659 |
| O | -0.6578939 | -0.1117645 | -0.6261299 |
| O | -0.3368429 | -1.6470505 | 1.6282141  |
| O | 0.0155141  | 2.6632125  | -0.6950459 |
| C | -3.0265649 | -0.1007785 | -0.5390679 |
| H | -3.6256939 | -0.6854225 | -1.2547699 |
| H | -3.6725359 | 0.1075305  | 0.3287461  |
| C | -2.4908469 | 1.1790715  | -1.1738479 |
| H | -3.1323099 | 1.5720075  | -1.9766149 |
| H | -2.3496029 | 1.9722905  | -0.4211229 |
| C | -1.1196789 | 0.7524595  | -1.6578699 |
| H | -1.2031449 | 0.1790135  | -2.6091339 |
| O | 0.7090891  | 0.9623075  | 1.6010311  |
| C | -0.1037329 | 1.8677815  | -1.8516139 |
| H | -0.5193049 | 2.5377135  | -2.6295289 |
| C | -1.5977349 | -1.0750325 | 1.3571081  |
| H | -1.6781389 | -0.0731875 | 1.8390451  |
| O | 2.2813551  | -1.1847435 | 0.3126411  |
| C | 1.2377231  | 1.3297015  | -2.3083839 |
| H | 1.1485611  | 0.7834125  | -3.2617529 |
| H | 1.9486221  | 2.1582025  | -2.4500179 |
| H | 1.6654961  | 0.6306805  | -1.5705119 |
| C | -2.6488849 | -2.0231755 | 1.9000601  |
| H | -2.5108459 | -2.1676485 | 2.9820401  |

|    |            |            |            |
|----|------------|------------|------------|
| H  | -3.6675029 | -1.6392895 | 1.7360721  |
| H  | -2.5582809 | -3.0053745 | 1.4086821  |
| Ru | 1.4863551  | -0.5238015 | 1.8084431  |
| I  | 4.3571661  | -0.5939625 | 0.5817411  |
| O  | 5.0551411  | -2.2408015 | 0.5418591  |
| O  | 3.2625821  | -0.1150895 | 2.2627481  |
| O  | 4.1917191  | 0.2471405  | -1.0363099 |
| O  | 5.6502991  | 0.5556875  | 1.1702461  |
| Na | 5.6833281  | 1.8967005  | -0.6128619 |
| O  | 1.2327281  | -1.6373005 | 3.2132301  |
| H  | 0.2750441  | 2.0684565  | 0.0282161  |
| H  | 0.1717141  | -1.8888755 | 2.7337051  |

$E_{\text{THF}} = -1333.55597994$   
 $G_{\text{THF}} = -1333.354110$

### 23

|   |            |            |            |
|---|------------|------------|------------|
| C | -2.2899884 | 1.1657086  | -0.9562198 |
| O | -1.8682354 | -0.0858584 | -1.4624218 |
| C | -2.5136454 | -1.1197824 | -0.7510498 |
| C | -3.9187034 | -0.5662044 | -0.5250018 |
| C | -3.6540284 | 0.9269166  | -0.2879948 |
| C | -1.8230844 | -1.4650924 | 0.5773812  |
| C | -2.2697884 | -2.8363124 | 1.0541312  |
| O | 0.0438686  | 1.5505646  | -0.5708478 |
| C | -1.2231184 | 1.7259916  | -0.0004578 |
| C | -1.4178654 | 3.2072186  | 0.2503882  |
| O | -0.4151684 | -1.4834294 | 0.5135262  |
| O | 2.4257596  | -1.1600844 | 0.4255072  |
| O | 2.4697066  | 1.1099156  | -0.6485928 |
| H | -2.3509614 | 1.8502776  | -1.8218958 |
| H | -2.4879084 | -2.0091654 | -1.4055538 |
| H | -4.5209244 | -0.7146964 | -1.4345248 |
| H | -4.4522894 | -1.0434864 | 0.3116572  |
| H | -4.4452614 | 1.5611006  | -0.7134458 |
| H | -3.6062894 | 1.1556646  | 0.7909472  |
| H | -2.1419954 | -0.7076844 | 1.3304632  |
| H | -1.8324084 | -3.0649704 | 2.0368872  |
| H | -3.3666734 | -2.9019874 | 1.1396292  |
| H | -1.9241174 | -3.6021324 | 0.3410602  |
| H | -1.2826464 | 1.1830796  | 0.9644402  |
| H | -0.6728934 | 3.5763786  | 0.9692532  |
| H | -1.2937734 | 3.7640376  | -0.6925468 |
| H | -2.4244874 | 3.4147236  | 0.6498552  |
| O | 0.7674516  | -0.9309344 | -1.8770158 |
| C | 3.7618516  | 0.6403486  | -0.2978838 |
| H | 4.4260696  | 0.8863506  | -1.1525948 |
| C | 3.6881416  | -0.8819124 | -0.1432998 |
| H | 4.4439186  | -1.2109834 | 0.5997092  |
| C | 3.9025426  | -1.6188024 | -1.4480418 |
| H | 3.7024506  | -2.6927374 | -1.3189748 |
| H | 3.2364596  | -1.2391044 | -2.2411208 |
| H | 4.9430196  | -1.4949314 | -1.7909158 |



|    |           |            |            |
|----|-----------|------------|------------|
| C  | 4.2173266 | 1.3732536  | 0.9451022  |
| H  | 5.2681156 | 1.1387376  | 1.1783342  |
| H  | 4.1207746 | 2.4592496  | 0.8042342  |
| H  | 3.5925016 | 1.0848306  | 1.8062152  |
| O  | 0.6589526 | 0.1555696  | 1.7298152  |
| H  | 1.4631626 | -0.2016304 | 2.1372052  |
| H  | 0.0425636 | -0.7900034 | 1.4300592  |
| Ru | 1.0216166 | -0.1079914 | -0.4454008 |

$E_{\text{THF}} = -1091.61095991$   
 $G_{\text{THF}} = -1091.296972$

**24**

|   |            |            |            |
|---|------------|------------|------------|
| C | -1.7349861 | 1.2876349  | -0.7603245 |
| O | -1.6660951 | -0.1184341 | -0.9510585 |
| C | -2.9507901 | -0.7230791 | -0.7966545 |
| C | -3.9410571 | 0.4321539  | -0.8793355 |
| C | -3.1467511 | 1.5808979  | -0.2705705 |
| C | -3.0052351 | -1.4931201 | 0.5237315  |
| C | -4.2072561 | -2.4076781 | 0.5848745  |
| O | 0.6254099  | 1.4268679  | -0.3656195 |
| C | -0.6358211 | 1.7101149  | 0.2033345  |
| C | -0.6515231 | 3.2006409  | 0.4803535  |
| O | -1.8691851 | -2.3002921 | 0.6717675  |
| O | 2.7912329  | -1.3108681 | 0.6414865  |
| O | 3.0029879  | 0.8092619  | -0.6908485 |
| O | 1.0054099  | -1.1389401 | -1.6866505 |
| C | 4.2494719  | 0.3362829  | -0.1927295 |
| C | 4.0983719  | -1.1542901 | 0.0987205  |
| C | 4.2998809  | -2.0319481 | -1.1158965 |
| C | 4.6257999  | 1.1480369  | 1.0263715  |
| O | 0.4499469  | -0.6900171 | 1.2315475  |
| H | -1.5416111 | 1.7882039  | -1.7336125 |
| H | -3.0679041 | -1.4526991 | -1.6198015 |
| H | -4.1832191 | 0.6516289  | -1.9321795 |
| H | -4.8863681 | 0.2309679  | -0.3522325 |
| H | -3.5049941 | 2.5756709  | -0.5749245 |
| H | -3.1803121 | 1.5345579  | 0.8334495  |
| H | -3.0671761 | -0.7457231 | 1.3517955  |
| H | -4.2097611 | -2.9616421 | 1.5349805  |
| H | -5.1590061 | -1.8612161 | 0.4989185  |
| H | -4.1494781 | -3.1452571 | -0.2330775 |
| H | -0.7794831 | 1.1367639  | 1.1410165  |
| H | 0.2069389  | 3.4749489  | 1.1099815  |
| H | -0.5752671 | 3.7658039  | -0.4631985 |
| H | -1.5742111 | 3.5027819  | 1.0005975  |
| H | -1.0986841 | -1.7062151 | 0.6927205  |
| H | 4.9880009  | 0.4840909  | -1.0070195 |
| H | 4.7991179  | -1.4505481 | 0.9043045  |
| H | 4.0386829  | -3.0755871 | -0.8859665 |
| H | 3.6740449  | -1.6973511 | -1.9602935 |
| H | 5.3523789  | -2.0004371 | -1.4407435 |
| H | 5.6435699  | 0.9005089  | 1.3679305  |

|    |           |            |            |
|----|-----------|------------|------------|
| H  | 4.5813259 | 2.2226869  | 0.7992415  |
| H  | 3.9196119 | 0.9376249  | 1.8470395  |
| H  | 0.9527389 | -1.3814931 | 1.7044455  |
| Ru | 1.4812509 | -0.2912941 | -0.3358705 |

$E_{\text{THF}} = -1091.64940909$   
 $G_{\text{THF}} = -1091.336133$

**25**

|    |            |            |            |
|----|------------|------------|------------|
| C  | -2.0263441 | 1.2699585  | -0.6665434 |
| O  | -1.7218971 | -0.0743005 | -0.9844294 |
| C  | -2.8754381 | -0.9107065 | -0.8270084 |
| C  | -4.0504041 | 0.0554945  | -0.7471524 |
| C  | -3.4266611 | 1.2670435  | -0.0681804 |
| C  | -2.6983931 | -1.7922375 | 0.4078836  |
| C  | -3.7883401 | -2.8351925 | 0.5153886  |
| O  | 0.3262879  | 1.7810245  | -0.3945244 |
| C  | -0.9602771 | 1.8422305  | 0.2450296  |
| C  | -1.2383501 | 3.2717835  | 0.6502756  |
| O  | -1.4844361 | -2.4850255 | 0.3432946  |
| O  | 2.9992509  | -1.5297905 | -0.4061304 |
| O  | 3.1622179  | 0.9649985  | 0.2064066  |
| O  | 1.4912439  | 0.0625055  | -2.1038644 |
| C  | 4.3083989  | 0.1874225  | 0.5938246  |
| C  | 4.3421949  | -1.0414195 | -0.2986654 |
| C  | 4.9090559  | -0.7642305 | -1.6749384 |
| C  | 4.2231829  | -0.1437655 | 2.0666306  |
| O  | 0.7233749  | -0.6404495 | 0.8589646  |
| H  | -2.0230281 | 1.8712205  | -1.6087634 |
| H  | -2.9186161 | -1.5737825 | -1.7106954 |
| H  | -4.3941991 | 0.3228505  | -1.7599014 |
| H  | -4.9108951 | -0.3544855 | -0.1981114 |
| H  | -3.9703851 | 2.2060445  | -0.2499204 |
| H  | -3.3691601 | 1.1160775  | 1.0251716  |
| H  | -2.7293331 | -1.1283275 | 1.3064196  |
| H  | -3.5929911 | -3.4820495 | 1.3828426  |
| H  | -4.7911421 | -2.3955225 | 0.6281756  |
| H  | -3.7805801 | -3.4731855 | -0.3844724 |
| H  | -0.8676101 | 1.1820575  | 1.1263986  |
| H  | -0.3815821 | 3.6782685  | 1.2059186  |
| H  | -1.4022151 | 3.9064395  | -0.2384434 |
| H  | -2.1309771 | 3.3435625  | 1.2905446  |
| H  | -0.7658311 | -1.8329505 | 0.3954966  |
| H  | 5.1830039  | 0.8372945  | 0.3927706  |
| H  | 4.9122629  | -1.8566125 | 0.1895496  |
| H  | 4.7756649  | -1.6396195 | -2.3269834 |
| H  | 4.3998019  | 0.0943655  | -2.1426094 |
| H  | 5.9850659  | -0.5351675 | -1.6100794 |
| H  | 5.1542339  | -0.6208715 | 2.4124346  |
| H  | 4.0591489  | 0.7698955  | 2.6564746  |
| H  | 3.3879769  | -0.8377595 | 2.2573916  |
| Ru | 1.7302799  | -0.1063315 | -0.4263494 |
| H  | 0.2264379  | 2.0232465  | -1.3295204 |

$E_{\text{THF}} = -1091.63417140$

$G_{\text{THF}} = -1091.323205$

**26**

|    |            |            |            |
|----|------------|------------|------------|
| C  | 2.4781032  | -1.6288514 | -0.6171998 |
| O  | 2.4810682  | -0.3861774 | -1.2743578 |
| C  | 2.7964772  | 0.6531116  | -0.3427128 |
| C  | 3.3998062  | -0.0400244 | 0.8850832  |
| C  | 3.5650162  | -1.4965954 | 0.4429852  |
| C  | 1.5382412  | 1.4688306  | -0.0530228 |
| C  | 1.8566552  | 2.7501456  | 0.6776712  |
| O  | 0.0898882  | -1.3475854 | -0.7490038 |
| C  | 1.1105092  | -1.9736664 | 0.0117402  |
| C  | 0.8945912  | -3.4647604 | 0.1230272  |
| O  | 0.9125342  | 1.8122646  | -1.2655738 |
| O  | -3.7107278 | -0.4682454 | -0.6408638 |
| O  | -1.6265948 | 0.6436896  | 0.2587082  |
| O  | -2.1287278 | -2.3206454 | 0.9267702  |
| C  | -2.6843048 | 1.5594206  | -0.0307138 |
| C  | -3.9778288 | 0.7463976  | 0.0539842  |
| C  | -4.4230578 | 0.4812466  | 1.4769602  |
| C  | -2.4544478 | 2.1878096  | -1.3860348 |
| O  | -1.7506168 | -1.6338454 | -1.9969538 |
| H  | 2.7072742  | -2.3926044 | -1.3828428 |
| H  | 3.5206862  | 1.3151246  | -0.8548418 |
| H  | 4.3511082  | 0.4133046  | 1.1993272  |
| H  | 2.7101992  | 0.0335676  | 1.7451272  |
| H  | 4.5507702  | -1.6554844 | -0.0216628 |
| H  | 3.4618862  | -2.2164924 | 1.2708872  |
| H  | 0.8510782  | 0.8459446  | 0.5633062  |
| H  | 0.9315932  | 3.3109716  | 0.8799132  |
| H  | 2.3610442  | 2.5596196  | 1.6384492  |
| H  | 2.5099522  | 3.3851856  | 0.0560132  |
| H  | 1.0520962  | -1.5087624 | 1.0167392  |
| H  | 0.8595102  | -3.9202784 | -0.8814248 |
| H  | 1.7157642  | -3.9415504 | 0.6821122  |
| H  | -0.0491158 | -3.6920034 | 0.6430442  |
| H  | 0.7538972  | 0.9679656  | -1.7161468 |
| H  | -2.6523898 | 2.3211596  | 0.7735262  |
| H  | -4.7829988 | 1.2507596  | -0.5148038 |
| H  | -5.2608708 | -0.2310274 | 1.4918282  |
| H  | -3.6004498 | 0.0632316  | 2.0806672  |
| H  | -4.7542988 | 1.4173736  | 1.9541482  |
| H  | -1.4252638 | 2.5732616  | -1.4464878 |
| H  | -2.5907788 | 1.4306426  | -2.1774718 |
| H  | -3.1679718 | 3.0081156  | -1.5638258 |
| H  | -0.4498318 | -1.7345374 | -1.6637588 |
| Ru | -1.9694728 | -1.1460074 | -0.2723148 |

$E_{\text{THF}} = -1091.60472549$

$G_{\text{THF}} = -1091.292626$

**27**

|    |            |            |            |
|----|------------|------------|------------|
| O  | -0.0000000 | -1.2717620 | 0.7828439  |
| O  | -0.0000000 | 1.2717620  | 0.7828439  |
| C  | -0.2995440 | -0.6961030 | -0.5022731 |
| H  | 0.2151410  | -1.3482870 | -1.2340501 |
| C  | 0.2995440  | 0.6961030  | -0.5022731 |
| H  | -0.2151410 | 1.3482870  | -1.2340501 |
| Ru | -0.0000000 | 0.0000000  | 2.1900529  |
| O  | -1.5116570 | -0.0164540 | 2.9563679  |
| O  | 1.5116570  | 0.0164540  | 2.9563679  |
| C  | 1.7936910  | 0.7113130  | -0.7314771 |
| H  | 2.0312700  | 0.3914540  | -1.7583611 |
| H  | 2.1956890  | 1.7231540  | -0.5784931 |
| H  | 2.2985570  | 0.0266710  | -0.0295841 |
| C  | -1.7936910 | -0.7113130 | -0.7314771 |
| H  | -2.0312700 | -0.3914540 | -1.7583611 |
| H  | -2.1956890 | -1.7231540 | -0.5784931 |
| H  | -2.2985570 | -0.0266710 | -0.0295841 |

$E_{\text{THF}} = -551.735855870$

$G_{\text{THF}} = -551.645124$

**28**

|   |            |            |            |
|---|------------|------------|------------|
| C | -2.4531463 | 1.0741217  | -0.9568493 |
| O | -1.9785223 | -0.1539453 | -1.4668083 |
| C | -2.5335803 | -1.1975963 | -0.6886693 |
| C | -3.9689623 | -0.7417943 | -0.4473903 |
| C | -3.8281353 | 0.7842737  | -0.3305803 |
| C | -1.7614703 | -1.4128243 | 0.6205307  |
| C | -2.0687593 | -2.7880043 | 1.1957317  |
| O | -0.1424813 | 1.5070647  | -0.4396563 |
| C | -1.4456863 | 1.6608577  | 0.0491797  |
| C | -1.6707283 | 3.1455067  | 0.2518847  |
| O | 2.5390447  | -1.3553993 | 0.2367877  |
| O | 2.3223157  | 1.1742257  | -0.5834763 |
| O | 0.8544657  | -0.8442183 | -1.9279743 |
| C | 3.6311967  | 0.7547507  | -0.2506073 |
| C | 3.7453797  | -0.7801143 | -0.2719613 |
| C | 4.0146117  | -1.3296183 | -1.6532713 |
| C | 4.0686847  | 1.4007827  | 1.0509667  |
| O | 1.3807447  | 0.0396837  | 1.6836247  |
| H | -2.5036173 | 1.7697387  | -1.8130573 |
| H | -2.4561073 | -2.1144673 | -1.2983933 |
| H | -4.5943693 | -1.0102473 | -1.3122923 |
| H | -4.4235743 | -1.1972463 | 0.4464567  |
| H | -4.6394533 | 1.3119017  | -0.8525323 |
| H | -3.8587243 | 1.1122237  | 0.7226817  |
| H | -1.6994513 | -3.5647613 | 0.5072507  |
| H | -1.5669753 | -2.9230923 | 2.1645827  |
| H | -3.1524353 | -2.9285303 | 1.3408447  |
| H | -1.5439473 | 1.1378607  | 1.0223057  |
| H | -0.9683993 | 3.5447817  | 0.9967547  |

|    |            |            |            |
|----|------------|------------|------------|
| H  | -1.5049673 | 3.6778157  | -0.6984043 |
| H  | -2.6994513 | 3.3470837  | 0.5930137  |
| H  | 2.2134327  | -0.8458473 | 1.1880027  |
| H  | 4.2708107  | 1.1447197  | -1.0730113 |
| H  | 4.5632497  | -1.0859873 | 0.4118327  |
| H  | 3.9749917  | -2.4285653 | -1.6436323 |
| H  | 3.2681667  | -0.9639653 | -2.3779023 |
| H  | 5.0119087  | -1.0168893 | -2.0023173 |
| H  | 5.1354507  | 1.1999967  | 1.2421657  |
| H  | 3.9239887  | 2.4893027  | 0.9921027  |
| H  | 3.4657867  | 1.0243297  | 1.8902557  |
| H  | 0.6816377  | -0.5070613 | 2.0769267  |
| H  | -2.1087263 | -0.6549133 | 1.3611957  |
| O  | -0.3763803 | -1.3622893 | 0.4717057  |
| Ru | 0.8821857  | -0.0936443 | -0.4279973 |

$E_{\text{THF}} = -1091.59729511$   
 $G_{\text{THF}} = -1091.283281$

## 29

|   |            |            |            |
|---|------------|------------|------------|
| C | -2.3388974 | 0.9585324  | -1.0741344 |
| O | -1.8671564 | -0.3565426 | -1.3011944 |
| C | -2.5995554 | -1.2317476 | -0.4650004 |
| C | -4.0260104 | -0.7028546 | -0.5626014 |
| C | -3.8158484 | 0.8175944  | -0.6662964 |
| C | -2.0848394 | -1.2288866 | 0.9831466  |
| C | -2.5129184 | -2.5031506 | 1.6925016  |
| O | -0.1162224 | 1.3640074  | -0.1990704 |
| C | -1.4777814 | 1.6468664  | -0.0053494 |
| C | -1.6048554 | 3.1561354  | -0.0889904 |
| O | 3.7835816  | -1.7421986 | 0.0258626  |
| O | 2.2049166  | 0.8622594  | -0.3764194 |
| O | 0.8184056  | -1.3783176 | -1.3211414 |
| C | 3.5786696  | 0.7251574  | -0.0802464 |
| C | 4.2313846  | -0.5598086 | -0.5946054 |
| C | 4.0484046  | -0.7080586 | -2.0919394 |
| C | 3.9089926  | 1.0612814  | 1.3669466  |
| O | 1.6607756  | -0.9058596 | 1.5550856  |
| H | -2.1992974 | 1.5050274  | -2.0233754 |
| H | -2.4663024 | -2.2423056 | -0.8886014 |
| H | -4.5048314 | -1.0929556 | -1.4733754 |
| H | -4.6540614 | -0.9909016 | 0.2951046  |
| H | -4.4931434 | 1.2733774  | -1.4026174 |
| H | -4.0069574 | 1.3194044  | 0.2980296  |
| H | -2.0434484 | -3.3746396 | 1.2086436  |
| H | -2.2046504 | -2.4826516 | 2.7475166  |
| H | -3.6077184 | -2.6265176 | 1.6533676  |
| H | -1.7943904 | 1.3166374  | 1.0028796  |
| H | -1.0122724 | 3.6396644  | 0.7001356  |
| H | -1.2335204 | 3.5080074  | -1.0644194 |
| H | -2.6577554 | 3.4647124  | 0.0212776  |
| H | 3.2740786  | -1.5266446 | 0.8226376  |
| H | 4.0231196  | 1.5355924  | -0.7015714 |

|                                   |            |            |            |
|-----------------------------------|------------|------------|------------|
| H                                 | 5.3180386  | -0.4238506 | -0.3832714 |
| H                                 | 4.5152576  | -1.6432826 | -2.4347364 |
| H                                 | 2.9777036  | -0.7427296 | -2.3537064 |
| H                                 | 4.5117336  | 0.1326894  | -2.6335144 |
| H                                 | 4.9932616  | 1.2296944  | 1.4645116  |
| H                                 | 3.3858966  | 1.9823654  | 1.6644576  |
| H                                 | 3.6149486  | 0.2638174  | 2.0609356  |
| H                                 | 0.9679086  | -1.4126266 | 2.0294066  |
| H                                 | -2.5442204 | -0.3716356 | 1.5206326  |
| O                                 | -0.6885244 | -1.1696066 | 1.0904936  |
| Ru                                | 0.7381026  | -0.3450516 | -0.0173944 |
| E <sub>THF</sub> = -1091.61724118 |            |            |            |
| G <sub>THF</sub> = -1091.301181   |            |            |            |

### 30

|   |            |            |            |
|---|------------|------------|------------|
| C | -2.3784723 | 0.9855834  | -0.9184535 |
| O | -2.0347463 | -0.3382366 | -1.2821575 |
| C | -2.8375723 | -1.2384406 | -0.5392525 |
| C | -4.1974253 | -0.5501616 | -0.4669145 |
| C | -3.8419563 | 0.9443984  | -0.4504855 |
| C | -2.2210913 | -1.5292676 | 0.8338945  |
| C | -2.8598343 | -2.7488366 | 1.4759935  |
| O | -0.1086153 | 1.1185404  | -0.0960165 |
| C | -1.4274253 | 1.5180444  | 0.1620935  |
| C | -1.4351623 | 3.0340784  | 0.1932945  |
| O | 3.7205747  | -1.6552856 | 0.3681125  |
| O | 2.3612527  | 0.6432284  | -0.6910065 |
| O | 0.8136717  | -1.4998846 | -1.3628435 |
| C | 3.7131437  | 0.7365104  | -0.2182145 |
| C | 4.3695627  | -0.6348086 | -0.3503725 |
| C | 4.4473017  | -1.0875816 | -1.7920235 |
| C | 3.7801447  | 1.3317344  | 1.1730505  |
| O | 1.3972177  | -0.7032206 | 1.6094595  |
| H | -2.2325903 | 1.6000944  | -1.8251495 |
| H | -2.8524793 | -2.1833976 | -1.1098245 |
| H | -4.7840683 | -0.7991246 | -1.3638605 |
| H | -4.7896093 | -0.8559586 | 0.4095415  |
| H | -4.5024803 | 1.5266184  | -1.1090765 |
| H | -3.9437023 | 1.3714634  | 0.5622295  |
| H | -2.6976743 | -3.6314006 | 0.8368175  |
| H | -2.4011183 | -2.9454956 | 2.4550085  |
| H | -3.9430093 | -2.6071646 | 1.6179145  |
| H | -1.7453303 | 1.1385724  | 1.1557965  |
| H | -0.7941723 | 3.4126574  | 1.0023915  |
| H | -1.0588063 | 3.4273834  | -0.7652045 |
| H | -2.4562563 | 3.4191044  | 0.3488275  |
| H | 3.2482587  | -1.2971296 | 1.1354495  |
| H | 4.2583637  | 1.4022174  | -0.9183975 |
| H | 5.4047687  | -0.4881756 | 0.0382475  |
| H | 4.9299717  | -2.0743576 | -1.8436085 |
| H | 3.4338887  | -1.1790106 | -2.2118395 |
| H | 5.0306747  | -0.3805326 | -2.4030845 |

|    |            |            |            |
|----|------------|------------|------------|
| H  | 4.8299387  | 1.4783744  | 1.4722645  |
| H  | 3.2861967  | 2.3173394  | 1.2002395  |
| H  | 3.2849867  | 0.6952164  | 1.9217335  |
| H  | -2.3835673 | -0.6553936 | 1.5045965  |
| O  | -0.8605853 | -1.8289016 | 0.7326825  |
| Ru | 0.5685017  | -0.6876946 | 0.1032215  |
| H  | 1.9093307  | 1.4983004  | -0.5950745 |

$E_{\text{THF}} = -1091.61695140$   
 $G_{\text{THF}} = -1091.301695$

**31**

|   |            |            |            |
|---|------------|------------|------------|
| C | -1.2479015 | 1.3298942  | -0.4515174 |
| O | -1.2238145 | 0.0247882  | -1.0346424 |
| C | -2.5232035 | -0.5533138 | -0.9026764 |
| C | -3.4583105 | 0.6187342  | -1.1550614 |
| C | -2.6988525 | 1.8128272  | -0.5543564 |
| C | -2.7077915 | -1.1884068 | 0.4809866  |
| C | -3.8336065 | -2.2055558 | 0.4643246  |
| O | 0.3414495  | 0.3328352  | 1.0123186  |
| C | -0.7203575 | 1.2388542  | 0.9895966  |
| C | -0.2041275 | 2.5814122  | 1.4672616  |
| O | -1.5574925 | -1.8626818 | 0.9317186  |
| O | 2.3400525  | -1.2930908 | 0.5095866  |
| H | -0.5371475 | 1.9322542  | -1.0440104 |
| H | -2.5812395 | -1.3429538 | -1.6716304 |
| H | -3.6002875 | 0.7528312  | -2.2377264 |
| H | -4.4518215 | 0.4712122  | -0.7033354 |
| H | -2.7905005 | 2.7092242  | -1.1835944 |
| H | -3.0867515 | 2.0791052  | 0.4438156  |
| H | -2.9655215 | -0.3918858 | 1.2122616  |
| H | -3.9745385 | -2.6347038 | 1.4659646  |
| H | -4.7808295 | -1.7409158 | 0.1443676  |
| H | -3.5887335 | -3.0245748 | -0.2307394 |
| H | -1.5344435 | 0.9019232  | 1.6635416  |
| H | 0.1441785  | 2.5141892  | 2.5076736  |
| H | 0.6405065  | 2.9065372  | 0.8367426  |
| H | -0.9979985 | 3.3451812  | 1.4127666  |
| O | 0.2474955  | -2.2918528 | -1.1710474 |
| C | 3.4048825  | -0.9784088 | -0.3821054 |
| H | 4.3255885  | -1.3734108 | 0.0935966  |
| C | 3.5053495  | 0.5506662  | -0.4363084 |
| H | 4.2596425  | 0.7991872  | -1.2079734 |
| C | 3.9232635  | 1.1417902  | 0.8956956  |
| H | 3.9753495  | 2.2386262  | 0.8226066  |
| H | 3.1851345  | 0.8798952  | 1.6720856  |
| H | 4.9082785  | 0.7677032  | 1.2203816  |
| C | 3.2135065  | -1.6018008 | -1.7436454 |
| H | 4.0991205  | -1.4173248 | -2.3729074 |
| H | 3.0613445  | -2.6890538 | -1.6680714 |
| H | 2.3391275  | -1.1550458 | -2.2429914 |
| O | 0.8995875  | -2.5539528 | 1.6454776  |
| H | 2.0833395  | -2.1446378 | 1.2220746  |

|    |           |            |            |
|----|-----------|------------|------------|
| O  | 2.2874315 | 1.1052822  | -0.8792124 |
| H  | 1.6433095 | 0.9278682  | -0.1653514 |
| Ru | 0.2373335 | -1.5192488 | 0.3240596  |

$E_{\text{THF}} = -1091.59623599$   
 $G_{\text{THF}} = -1091.282925$

### 32

|   |            |            |            |
|---|------------|------------|------------|
| C | 0.4356756  | 0.6188898  | -0.2208737 |
| H | 1.3061996  | 0.4603728  | -0.8987927 |
| C | -0.0575934 | -0.7707252 | 0.1558303  |
| H | 0.8366256  | -1.3209152 | 0.5302332  |
| C | -0.6371444 | -1.5083852 | -1.0322918 |
| H | 0.0966056  | -1.5887162 | -1.8504678 |
| H | -0.9375244 | -2.5317352 | -0.7502448 |
| H | -1.5182504 | -0.9670452 | -1.4068458 |
| C | 0.8826006  | 1.4098108  | 0.9900573  |
| H | 1.6716686  | 0.8785918  | 1.5463233  |
| H | 1.2872446  | 2.3912888  | 0.6900773  |
| H | 0.0270026  | 1.5659158  | 1.6633103  |
| O | -1.0103714 | -0.6256942 | 1.1889883  |
| H | -1.4246014 | -1.4846772 | 1.3276782  |
| O | -0.6079434 | 1.2755948  | -0.9106787 |
| H | -0.3501934 | 2.1974288  | -1.0223027 |

$E_{\text{THF}} = -308.739012248$   
 $G_{\text{THF}} = -308.629976$

### NaIO<sub>4</sub>

|    |            |            |            |
|----|------------|------------|------------|
| I  | -0.5875062 | -0.0123668 | 0.0102888  |
| O  | -1.5876572 | 1.4615232  | 0.1189148  |
| O  | -1.5269012 | -1.5277538 | -0.0644672 |
| O  | 0.6062818  | 0.0961112  | -1.3651232 |
| O  | 0.6572238  | -0.0689528 | 1.3431858  |
| Na | 2.4385588  | 0.0514392  | -0.0427992 |

$E_{\text{THF}} = -474.283927618$   
 $G_{\text{THF}} = -474.304476$

### NaIO<sub>3</sub>

|    |            |            |            |
|----|------------|------------|------------|
| I  | -0.6369028 | -0.1625548 | 0.8892466  |
| O  | -0.0616838 | 1.5322262  | 0.4678246  |
| O  | 0.9942582  | -1.0019368 | 0.7732386  |
| O  | -1.2566758 | -0.6173888 | -0.7810124 |
| Na | 0.9610042  | 0.2496542  | -1.3492974 |

$E_{\text{THF}} = -399.169922227$   
 $G_{\text{THF}} = -399.193133$

### H<sub>2</sub>O

|   |           |           |           |
|---|-----------|-----------|-----------|
| O | 0.0000000 | 0.0000000 | 0.4003193 |
|---|-----------|-----------|-----------|



|   |          |            |            |
|---|----------|------------|------------|
| H | 0.000000 | 0.7534980  | -0.2001597 |
| H | 0.000000 | -0.7534980 | -0.2001597 |

$E_{\text{THF}} = -76.4129602233$   
 $G_{\text{THF}} = -76.409081$

### 2-E-Buten

|   |            |            |            |
|---|------------|------------|------------|
| C | -0.4642843 | -0.4793494 | -0.0136133 |
| H | -1.4941273 | -0.2127644 | 0.2659717  |
| C | 0.4642847  | 0.4793486  | 0.0136137  |
| H | 1.4941237  | 0.2127686  | -0.2659873 |
| C | -0.2175993 | -1.8982384 | -0.3962253 |
| H | -0.4773393 | -2.5917884 | 0.4222947  |
| H | -0.8328853 | -2.1994454 | -1.2617763 |
| H | 0.8392577  | -2.0646014 | -0.6581483 |
| C | 0.2176067  | 1.8982306  | 0.3962597  |
| H | -0.8392393 | 2.0645806  | 0.6582357  |
| H | 0.8329837  | 2.1994956  | 1.2617087  |
| H | 0.4772187  | 2.5917636  | -0.4223333 |

$E_{\text{THF}} = -157.098882759$   
 $G_{\text{THF}} = -157.018849$

(b) Absolute energies and cartesian coordinates for the regioselectivity of Ru-catalysed oxidative cyclisation of methyl 1,5-dienoate (**5a**). All energies are in Hartree.

Here, due to the difficulty in locating the TS **6a** using the DFT functional M06 (M06/cc-pVDZ/LANL2DZ), both TSs **6a** and **d-6a** have been optimised in gas phase with M06-2X (M06-2X/cc-pVDZ/LANL2DZ) followed by single point energy calculations in THF with the M06 functional ((SMD)-M06//aug-cc-pVDZ/LANL2DZ) in order to compare them directly. So, only **5a**, **RuO<sub>4</sub>**, **6a** and **d-6a** are optimised with M06-2X/cc-pVDZ/LANL2DZ then single point energy with M06/aug-cc-pVDZ/LANL2DZ.

### 5a

|   |            |            |            |
|---|------------|------------|------------|
| C | -0.7827026 | -0.8445225 | 0.4304432  |
| C | -1.9968156 | -1.2618645 | 0.0582412  |
| H | -2.2052136 | -2.3097745 | -0.1569368 |
| H | -0.6382766 | 0.2176935  | 0.6366242  |
| C | 0.4066174  | -1.7441855 | 0.5623292  |
| H | 0.8525914  | -1.6119595 | 1.5586642  |
| H | 0.0873774  | -2.7901085 | 0.4684132  |
| C | 1.4895864  | -1.4457215 | -0.4963788 |
| H | 2.3050504  | -2.1705635 | -0.3750108 |
| H | 1.0491484  | -1.6055495 | -1.4913348 |

|   |            |            |            |
|---|------------|------------|------------|
| C | 2.0450674  | -0.0534395 | -0.4019188 |
| C | 3.3060984  | 0.2330055  | -0.0727938 |
| H | 1.3604014  | 0.7720385  | -0.6206198 |
| C | 3.8729124  | 1.6173895  | 0.0276402  |
| H | 3.9927074  | -0.5940515 | 0.1350522  |
| H | 4.6915464  | 1.7573335  | -0.6914008 |
| H | 3.1032304  | 2.3721645  | -0.1720218 |
| H | 4.2883814  | 1.7996055  | 1.0279972  |
| C | -3.1682506 | -0.3709365 | -0.1056608 |
| O | -4.2573606 | -0.7577295 | -0.4630868 |
| O | -2.9076846 | 0.9204995  | 0.1785562  |
| C | -4.0221926 | 1.7998845  | 0.0185472  |
| H | -3.6587846 | 2.7914355  | 0.2965662  |
| H | -4.3665286 | 1.7891955  | -1.0215138 |
| H | -4.8469056 | 1.4901605  | 0.6696022  |

$E_{\text{THF}} = -501.516503571$

$G_{\text{THF}} = -501.342774$

#### **RuO<sub>4</sub>**

|    |            |            |            |
|----|------------|------------|------------|
| O  | 0.9722320  | 0.9722320  | 0.9722320  |
| O  | -0.9722320 | -0.9722320 | 0.9722320  |
| O  | -0.9722320 | 0.9722320  | -0.9722320 |
| O  | 0.9722320  | -0.9722320 | -0.9722320 |
| Ru | 0.0000000  | 0.0000000  | 0.0000000  |

$E_{\text{THF}} = -394.514781651$

$G_{\text{THF}} = -394.528209$

#### **d-6a**

|    |            |            |            |
|----|------------|------------|------------|
| C  | -2.4459822 | 0.3284001  | 0.2516494  |
| C  | -3.5484322 | -0.4172549 | 0.1614044  |
| H  | -4.2441452 | -0.2284219 | -0.6624336 |
| H  | -1.7517852 | 0.1358091  | 1.0750654  |
| O  | 0.2384468  | -1.1580869 | 0.1541514  |
| O  | 2.3953778  | -2.7789559 | 0.8324614  |
| O  | 2.3328618  | -1.2015129 | -1.4595316 |
| C  | -2.0706832 | 1.4064391  | -0.7253736 |
| H  | -1.9339452 | 2.3636321  | -0.1992186 |
| H  | -2.8895252 | 1.5451031  | -1.4426066 |
| C  | -0.7848332 | 1.0849431  | -1.4983276 |
| H  | -0.6225862 | 1.8361521  | -2.2835256 |
| H  | -0.9004532 | 0.1170671  | -2.0071776 |
| C  | 0.4409998  | 1.0282141  | -0.6302736 |
| C  | 1.7045828  | 1.0356551  | -1.1360196 |
| H  | 0.3216938  | 1.1187021  | 0.4489014  |
| H  | 1.8953558  | 1.1553331  | -2.2009586 |
| O  | 0.7003998  | -3.4416349 | -1.3420116 |
| Ru | 1.4324048  | -2.2247749 | -0.4339856 |
| C  | -3.9148872 | -1.5161169 | 1.1126524  |
| H  | -4.0151322 | -2.4730869 | 0.5826824  |
| H  | -4.8799482 | -1.3133659 | 1.5964374  |
| H  | -3.1513882 | -1.6301569 | 1.8909634  |

|   |           |            |            |
|---|-----------|------------|------------|
| C | 2.9149338 | 1.0785001  | -0.2789606 |
| O | 2.6798548 | 0.5761521  | 0.9485324  |
| O | 3.9907718 | 1.4850171  | -0.6435096 |
| C | 3.8222208 | 0.5342721  | 1.8102384  |
| H | 4.6068388 | -0.0820559 | 1.3585834  |
| H | 3.4693768 | 0.0904461  | 2.7430894  |
| H | 4.2076078 | 1.5455871  | 1.9771014  |

$E_{\text{THF}} = -896.041976051$   
 $G_{\text{THF}} = -895.863242$

**6a**

|    |            |            |            |
|----|------------|------------|------------|
| C  | 1.1627201  | 1.4386145  | 0.1230582  |
| C  | 2.1349671  | 1.0133135  | -0.6894518 |
| H  | 2.3077511  | 1.4604635  | -1.6685458 |
| H  | 1.0518031  | 0.9622815  | 1.0968822  |
| O  | -0.4485939 | -0.8558555 | 0.7582782  |
| O  | -0.7673399 | -3.5298325 | 0.0706282  |
| O  | -1.7914769 | -1.4297435 | -1.4347318 |
| C  | 0.1662841  | 2.4922735  | -0.2643678 |
| H  | -0.0650649 | 3.1300785  | 0.5999902  |
| H  | 0.5924911  | 3.1323875  | -1.0468018 |
| C  | -1.1367549 | 1.8746175  | -0.7991228 |
| H  | -1.7873119 | 2.6872935  | -1.1560108 |
| H  | -0.9073579 | 1.2491005  | -1.6740558 |
| C  | -1.9020919 | 1.0505195  | 0.2012402  |
| C  | -2.9668259 | 0.2820115  | -0.1389688 |
| H  | -1.6374309 | 1.1424395  | 1.2568112  |
| C  | -3.7359339 | -0.5509375 | 0.8344692  |
| H  | -3.3327149 | 0.3210055  | -1.1662998 |
| H  | -3.7350869 | -1.6039935 | 0.5196892  |
| H  | -3.2990129 | -0.4860715 | 1.8372342  |
| H  | -4.7856329 | -0.2314465 | 0.8792402  |
| O  | 0.9617811  | -1.8320545 | -1.4160448 |
| Ru | -0.4608279 | -1.9784365 | -0.5207978 |
| C  | 3.0475001  | -0.1079975 | -0.3669868 |
| O  | 3.9823931  | -0.4339255 | -1.0600728 |
| O  | 2.7167581  | -0.7492125 | 0.7724202  |
| C  | 3.5165341  | -1.8981085 | 1.0560782  |
| H  | 3.1314191  | -2.3021205 | 1.9947932  |
| H  | 3.4168041  | -2.6297995 | 0.2458502  |
| H  | 4.5702531  | -1.6168655 | 1.1555962  |

$E_{\text{THF}} = -896.048541757$   
 $G_{\text{THF}} = -895.868330$

**d-7a**

|   |            |            |            |
|---|------------|------------|------------|
| C | -2.6511416 | 0.0473059  | -0.1869924 |
| C | -3.4074726 | -0.8365041 | -0.8436164 |
| H | -3.6232726 | -0.6491291 | -1.9066044 |
| H | -2.4257746 | -0.1322411 | 0.8725846  |

|    |            |            |            |
|----|------------|------------|------------|
| O  | 0.0631164  | 0.0283669  | 0.8593306  |
| O  | 1.5919574  | -2.3260201 | 1.7945636  |
| O  | 1.8135744  | -0.8382101 | -0.7638614 |
| C  | -2.0260486 | 1.2477569  | -0.8321404 |
| H  | -2.0644526 | 2.1197889  | -0.1526274 |
| H  | -2.6161486 | 1.5213139  | -1.7242054 |
| C  | -0.5787646 | 1.0301999  | -1.2789004 |
| H  | -0.2672356 | 1.8520799  | -1.9493834 |
| H  | -0.5088266 | 0.0956109  | -1.8676014 |
| C  | 0.4303694  | 0.9873989  | -0.1455704 |
| C  | 1.8150684  | 0.5706199  | -0.6097314 |
| H  | 0.4621784  | 1.9633219  | 0.3757916  |
| H  | 2.0581834  | 1.0084909  | -1.5964464 |
| O  | -0.5402186 | -2.5821301 | -0.3033634 |
| Ru | 0.6881274  | -1.7290841 | 0.4922936  |
| C  | -3.9788136 | -2.0779281 | -0.2526764 |
| H  | -3.6175256 | -2.9738251 | -0.7859214 |
| H  | -5.0800696 | -2.0948851 | -0.3211524 |
| H  | -3.6965756 | -2.1817401 | 0.8070796  |
| C  | 2.8652774  | 1.0869109  | 0.3634046  |
| O  | 3.5366794  | 0.1120269  | 0.9681416  |
| O  | 3.0313154  | 2.2662609  | 0.5499856  |
| C  | 4.4996574  | 0.5459869  | 1.9278616  |
| H  | 5.2798044  | 1.1508459  | 1.4429726  |
| H  | 4.9284024  | -0.3653061 | 2.3578916  |
| H  | 4.0186284  | 1.1527169  | 2.7088936  |

$E_{\text{THF}} = -896.142330227$   
 $G_{\text{THF}} = -895.958877$

**7a**

|   |            |            |            |
|---|------------|------------|------------|
| C | 1.3999294  | 0.9308101  | -0.3930308 |
| C | 2.3273454  | 0.7285611  | -1.3345218 |
| H | 2.3927824  | 1.3622771  | -2.2256518 |
| H | 1.3758184  | 0.2617451  | 0.4741372  |
| O | -0.8824126 | -0.0761859 | 1.2186252  |
| O | -1.6813286 | -2.8573179 | 1.8162122  |
| O | -2.7955126 | -1.0148409 | -0.1688278 |
| C | 0.3635944  | 2.0037401  | -0.4664518 |
| H | 0.3979204  | 2.6149161  | 0.4561802  |
| H | 0.6067114  | 2.6803311  | -1.3029048 |
| C | -1.0626726 | 1.4781071  | -0.6508908 |
| H | -1.7070186 | 2.2992801  | -1.0130888 |
| H | -1.0831346 | 0.6959351  | -1.4338468 |
| C | -1.7051316 | 0.9349581  | 0.6138752  |
| C | -3.0567736 | 0.2966711  | 0.3643452  |
| H | -1.7728966 | 1.7385361  | 1.3754822  |
| C | -3.9110936 | 0.1828621  | 1.6061092  |
| H | -3.6029516 | 0.8269091  | -0.4394738 |
| H | -4.8073406 | -0.4193929 | 1.3995072  |
| H | -3.3466376 | -0.3017199 | 2.4201182  |
| H | -4.2301896 | 1.1790231  | 1.9510272  |

|    |            |            |            |
|----|------------|------------|------------|
| O  | -0.1344326 | -2.1701749 | -0.6862508 |
| Ru | -1.2366886 | -1.8204349 | 0.5509872  |
| C  | 3.3330064  | -0.3481939 | -1.2992718 |
| O  | 4.1422194  | -0.5424179 | -2.1760908 |
| O  | 3.2578064  | -1.1016759 | -0.1841928 |
| C  | 4.1800324  | -2.1800349 | -0.1341248 |
| H  | 3.9930064  | -2.7004579 | 0.8126332  |
| H  | 4.0280034  | -2.8666269 | -0.9811398 |
| H  | 5.2180404  | -1.8151869 | -0.1694808 |

$E_{\text{THF}} = -896.154419214$   
 $G_{\text{THF}} = -895.970475$

**d-7a<sub>NaIO4</sub>**

|    |            |            |            |
|----|------------|------------|------------|
| C  | -1.6388149 | 2.1428081  | 1.2780935  |
| H  | -1.8660409 | 2.4364211  | 0.2462365  |
| O  | -0.8610319 | 0.1607831  | -0.1690005 |
| O  | 0.2185081  | -1.9098009 | 0.8276485  |
| C  | -2.5656919 | 1.1721271  | 1.9457245  |
| H  | -3.5613179 | 1.2201931  | 1.4712695  |
| H  | -2.7059269 | 1.4551491  | 3.0038305  |
| C  | -2.0563709 | -0.2704189 | 1.8954675  |
| H  | -2.7920029 | -0.9581329 | 2.3489785  |
| H  | -1.1269589 | -0.3567649 | 2.4871805  |
| C  | -1.7802109 | -0.7074789 | 0.4680345  |
| H  | -2.7117889 | -0.7126359 | -0.1316515 |
| C  | -0.5574129 | 2.6920961  | 1.8704185  |
| H  | -0.3621679 | 2.4523631  | 2.9257025  |
| C  | -1.0954219 | -2.0738739 | 0.3754445  |
| H  | -1.6008439 | -2.8336309 | 0.9998085  |
| Ru | 0.9852301  | -0.2378609 | 0.2828995  |
| O  | 1.2390571  | 0.8643051  | 1.5306815  |
| O  | 2.6774601  | -1.1758359 | 0.0926485  |
| I  | 3.4439761  | -0.4876029 | -1.5971065 |
| O  | 2.9408711  | -1.3354699 | -3.0919555 |
| O  | 5.0807241  | -1.1734499 | -1.1558215 |
| O  | 4.0970321  | 1.2129381  | -1.7921475 |
| O  | 1.5237571  | 0.4138941  | -1.3439735 |
| Na | 6.2316231  | 0.7120401  | -1.2815295 |
| C  | 0.3398401  | 3.6827971  | 1.2155255  |
| H  | 1.4002071  | 3.4463201  | 1.3979555  |
| H  | 0.1774401  | 3.7053991  | 0.1261315  |
| H  | 0.1685471  | 4.6998261  | 1.6107005  |
| C  | -1.1561329 | -2.5283129 | -1.0785925 |
| O  | 0.0043511  | -2.3260429 | -1.6990085 |
| O  | -2.1625749 | -2.9511209 | -1.5888695 |
| C  | 0.0116961  | -2.5658589 | -3.1123445 |
| H  | 0.9927081  | -2.2184609 | -3.4585475 |
| H  | -0.1266019 | -3.6392089 | -3.3087905 |
| H  | -0.8057169 | -2.0074969 | -3.5910415 |

$E_{\text{THF}} = -1370.46172646$   
 $G_{\text{THF}} = -1370.272344$

**7a<sub>NaIO4</sub>**

|    |            |            |            |
|----|------------|------------|------------|
| C  | -2.1935765 | 1.4234565  | 0.2486158  |
| H  | -1.8413775 | 1.3715275  | 1.2832158  |
| O  | -0.6594715 | -0.6602405 | 0.6544118  |
| O  | 0.1252225  | -2.2357465 | -1.1235232 |
| C  | -3.2510675 | 0.4624185  | -0.1884602 |
| H  | -3.9081735 | 0.1959625  | 0.6574518  |
| H  | -3.8878005 | 0.9216865  | -0.9639662 |
| C  | -2.6262565 | -0.8142215 | -0.7668292 |
| H  | -3.4217315 | -1.5212315 | -1.0634662 |
| H  | -2.0620855 | -0.5657795 | -1.6856362 |
| C  | -1.6977215 | -1.5165135 | 0.2124888  |
| H  | -2.2629635 | -1.8182655 | 1.1186868  |
| C  | -1.5823385 | 2.2863975  | -0.5798012 |
| H  | -1.9122755 | 2.4325585  | -1.6145672 |
| C  | -0.9861935 | -2.7312855 | -0.3855772 |
| H  | -1.6417115 | -3.2327015 | -1.1254312 |
| Ru | 0.8179295  | -0.5457155 | -0.5757662 |
| O  | 0.4410545  | 0.7582395  | -1.5613792 |
| O  | 2.5251365  | -1.1856375 | -1.2134822 |
| C  | -0.5056705 | -3.7087195 | 0.6624398  |
| H  | -1.3555255 | -4.1919305 | 1.1700468  |
| H  | 0.1164005  | -4.4878365 | 0.1993948  |
| H  | 0.1005105  | -3.1830565 | 1.4191568  |
| I  | 3.8501505  | -0.4403835 | 0.0749978  |
| O  | 4.3231725  | -1.4332645 | 1.4849788  |
| O  | 5.1662385  | -0.6509725 | -1.1762402 |
| O  | 4.0956945  | 1.3723195  | 0.1800658  |
| O  | 1.8883625  | -0.0664895 | 0.8409608  |
| Na | 5.7001315  | 1.4904555  | -1.4087162 |
| C  | -0.3726835 | 3.0479425  | -0.2090282 |
| O  | 0.1410025  | 3.8976395  | -0.8992442 |
| O  | 0.1349225  | 2.6190945  | 0.9587228  |
| C  | 1.4357595  | 3.1003495  | 1.2777148  |
| H  | 2.1427225  | 2.8520315  | 0.4709938  |
| H  | 1.4261905  | 4.1894885  | 1.4391418  |
| H  | 1.7380225  | 2.5684225  | 2.1876278  |

 $E_{\text{gas}} = -1370.42993459$  $G_{\text{gas}} = -1370.240109$  $E_{\text{THF}} = -1370.47073000$  $G_{\text{THF}} = -1370.280905$ **d-8a<sub>NaIO4</sub>**

|   |            |            |            |
|---|------------|------------|------------|
| C | -1.9162655 | 2.0255220  | -0.2587817 |
| H | -1.8588375 | 1.9537250  | -1.3495407 |
| O | -0.8831645 | 0.0304400  | -0.4547697 |
| O | -0.1469405 | -1.4405570 | 1.5227473  |
| C | -3.0889605 | 1.3968730  | 0.4263843  |
| H | -3.8851215 | 1.2015100  | -0.3113547 |

|                                   |            |            |            |
|-----------------------------------|------------|------------|------------|
| H                                 | -3.5047335 | 2.0904660  | 1.1777063  |
| C                                 | -2.6997715 | 0.0825260  | 1.1092733  |
| H                                 | -3.5907775 | -0.4614400 | 1.4658603  |
| H                                 | -2.0645565 | 0.2852600  | 1.9896763  |
| C                                 | -1.9210995 | -0.7530610 | 0.1103363  |
| H                                 | -2.5800315 | -1.1065670 | -0.7068367 |
| C                                 | -1.0187785 | 2.8614020  | 0.3698843  |
| H                                 | -1.2316285 | 3.1521710  | 1.4056663  |
| C                                 | -1.1891925 | -1.9439700 | 0.7391693  |
| H                                 | -1.8662865 | -2.5454110 | 1.3747233  |
| Ru                                | 0.7527065  | 0.0130850  | 0.6564033  |
| O                                 | 0.4733345  | 1.5655590  | 1.3156833  |
| O                                 | 2.4407885  | -0.5124000 | 1.5148073  |
| I                                 | 3.7727355  | -0.4169170 | 0.0744303  |
| O                                 | 3.9629225  | -1.8559290 | -0.9797027 |
| O                                 | 5.1528385  | -0.5173650 | 1.2713923  |
| O                                 | 4.3498775  | 1.1872260  | -0.6061937 |
| O                                 | 1.8525595  | 0.0597190  | -0.7946117 |
| Na                                | 6.1384665  | 1.3731130  | 0.7482773  |
| C                                 | 0.0101095  | 3.6336010  | -0.3780887 |
| H                                 | 0.8807715  | 3.8566240  | 0.2555873  |
| H                                 | 0.3607685  | 3.0711270  | -1.2590777 |
| H                                 | -0.3998005 | 4.5979180  | -0.7275737 |
| C                                 | -0.6912235 | -2.8319360 | -0.3979027 |
| O                                 | -1.4281765 | -3.4941460 | -1.0842657 |
| O                                 | 0.6241075  | -2.7140960 | -0.5566367 |
| C                                 | 1.1906635  | -3.3488110 | -1.7087187 |
| H                                 | 2.2338485  | -3.0106890 | -1.7386487 |
| H                                 | 1.1254755  | -4.4418350 | -1.6033127 |
| H                                 | 0.6433725  | -3.0427380 | -2.6119917 |
| $E_{\text{gas}} = -1370.41822307$ |            |            |            |
| $G_{\text{gas}} = -1370.228095$   |            |            |            |
| $E_{\text{THF}} = -1370.46016232$ |            |            |            |
| $G_{\text{THF}} = -1370.270034$   |            |            |            |

**8a<sub>NaIO4</sub>**

|   |            |            |            |
|---|------------|------------|------------|
| C | -2.2842454 | 0.9141148  | 0.1415229  |
| H | -2.1480434 | 1.1369398  | 1.2018119  |
| O | -0.7507344 | -0.5621962 | 0.5807119  |
| O | 0.4725946  | -2.1411152 | -1.0299381 |
| C | -3.2691414 | -0.1333372 | -0.2716161 |
| H | -3.9074544 | -0.4102152 | 0.5833999  |
| H | -3.9291424 | 0.2598268  | -1.0634341 |
| C | -2.5308484 | -1.3763692 | -0.7772461 |
| H | -3.2278384 | -2.2138172 | -0.9489191 |
| H | -2.0281954 | -1.1631462 | -1.7385151 |
| C | -1.4892004 | -1.7305042 | 0.2684079  |
| H | -1.9948174 | -2.0711262 | 1.1962799  |
| C | -1.7263754 | 1.7927168  | -0.7717551 |
| H | -2.1066274 | 1.8424718  | -1.7957221 |
| C | -0.4657614 | -2.7798512 | -0.1743821 |

|    |            |            |            |
|----|------------|------------|------------|
| H  | -0.9674424 | -3.5545552 | -0.7891391 |
| Ru | 0.7864706  | -0.3097822 | -0.6401491 |
| O  | 0.0053356  | 0.8973538  | -1.5752931 |
| O  | 2.5371706  | -0.3841412 | -1.5568151 |
| C  | 0.2531256  | -3.4107932 | 0.9977619  |
| H  | -0.4430664 | -3.9845142 | 1.6299979  |
| H  | 1.0393016  | -4.0902022 | 0.6379129  |
| H  | 0.7246796  | -2.6277962 | 1.6155759  |
| I  | 3.7698626  | 0.4921998  | -0.3175761 |
| O  | 4.4835266  | -0.4496782 | 1.0850519  |
| O  | 5.1983126  | 0.1565438  | -1.4065791 |
| O  | 3.6959796  | 2.2778968  | -0.1543301 |
| O  | 1.8510066  | 0.3015138  | 0.6959459  |
| Na | 6.3632546  | -1.0769702 | -0.0280231 |
| C  | -0.8620514 | 2.9311298  | -0.3755461 |
| O  | -0.6442794 | 3.8841178  | -1.0811141 |
| O  | -0.3228704 | 2.7177538  | 0.8314519  |
| C  | 0.7722326  | 3.5680088  | 1.1828139  |
| H  | 1.6614656  | 3.2894208  | 0.5928349  |
| H  | 0.5185586  | 4.6232948  | 1.0085859  |
| H  | 0.9652586  | 3.3848078  | 2.2460259  |

$E_{\text{gas}} = -1370.41999481$   
 $G_{\text{gas}} = -1370.228920$   
 $E_{\text{THF}} = -1370.46415077$   
 $G_{\text{THF}} = -1370.273076$

**9a<sub>NaIO4</sub>**

|    |            |            |            |
|----|------------|------------|------------|
| C  | -1.5084722 | -1.0185949 | 1.2720414  |
| H  | -2.5258672 | -1.2781869 | 0.9377334  |
| O  | -1.1806952 | 0.2925031  | 0.7400014  |
| O  | 0.7915358  | -1.4673439 | 0.7301364  |
| O  | 0.9889978  | 1.8078311  | 1.1783864  |
| C  | -1.3982712 | -0.9046229 | 2.7963104  |
| H  | -2.3837802 | -1.0735139 | 3.2558764  |
| H  | -0.7096812 | -1.6602859 | 3.2033114  |
| C  | -0.8950482 | 0.5138961  | 3.0580574  |
| H  | -1.3386682 | 0.9698901  | 3.9548954  |
| H  | 0.2007628  | 0.5274851  | 3.1775444  |
| C  | -1.2608142 | 1.2800631  | 1.7990424  |
| H  | -2.2980922 | 1.6653171  | 1.8285744  |
| C  | -0.2878952 | 2.3859841  | 1.4163484  |
| H  | -0.1568162 | 3.0367641  | 2.3048504  |
| C  | -0.5103352 | -1.9643989 | 0.6117444  |
| H  | -0.5556562 | -2.9423159 | 1.1331214  |
| O  | 2.8347438  | 0.2305661  | -0.2914246 |
| C  | -0.7489092 | 3.2109371  | 0.2341904  |
| H  | -1.6939102 | 3.7282121  | 0.4645804  |
| H  | 0.0115788  | 3.9638661  | -0.0170556 |
| H  | -0.9037012 | 2.5754561  | -0.6526686 |
| Ru | 0.9645568  | 0.3052911  | 0.0374914  |
| I  | 3.0578158  | 0.5516201  | -2.3055976 |



|    |            |            |            |
|----|------------|------------|------------|
| O  | 3.0911838  | 2.1816981  | -3.0660036 |
| O  | 0.8414578  | 0.6765121  | -1.6893206 |
| O  | 4.8053978  | 0.0140681  | -2.2105226 |
| O  | 2.5929398  | -0.7973929 | -3.4827036 |
| Na | 4.6352838  | -1.7574169 | -3.4868986 |
| C  | -0.9539132 | -2.2297729 | -0.8287386 |
| O  | 0.0435058  | -2.0845529 | -1.6865136 |
| O  | -2.0916702 | -2.5195759 | -1.1098976 |
| C  | -0.3057642 | -2.0638719 | -3.0765096 |
| H  | -0.5060862 | -3.0872759 | -3.4285366 |
| H  | -1.2079902 | -1.4530559 | -3.2241176 |
| H  | 0.5622758  | -1.6157809 | -3.5777276 |

$E_{\text{gas}} = -1370.49923130$

$G_{\text{gas}} = -1370.303617$

$E_{\text{THF}} = -1370.54325062$

$G_{\text{THF}} = -1370.347636$
